# Supplementary material for: Solvent processing for improved separation of hydrothermal liquefaction products
Source: Royal Society of Chemistry journal article supplement (doi:10.1039/d4se00516c), 2024-01-01
Supplement: d4se00516c2.pdf [file d4se00516c2.pdf]

GC-MS of organic extract from hydro-char slurry.

Toluene was mixed with the slurry at a ratio of 1:10 (slurry to solvent). Please refer to S25 and S26 for the GC-MS graphs.

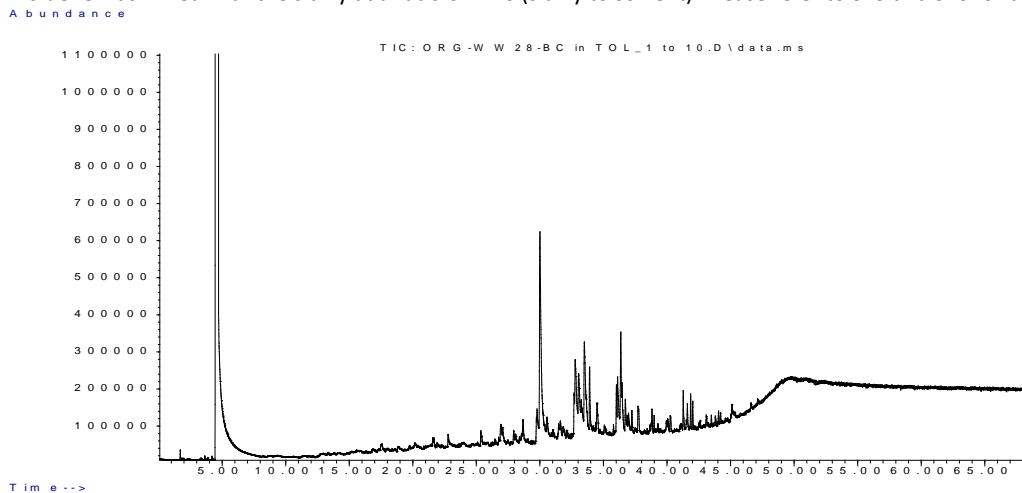

Data file Name :D:\MassHunter\GCMS\1\data\23-JAN-27-Uriah\ORG-WW28-BC in TOL\_1 to 10.D

Acquired date :27 Jan 2023 12:15

Method Name :D:\MassHunter\GCMS\1\methods\61309-W-FID-INSTALLED.M

Sample Name :ORG-WW28-BC in TOL\_1 to 10

Library #1 :D:\MassHunter\Databases\NIST11.L

Library #2 :

Library #3 :

| Compound number (#) | RT (min) | Scan number (#) | Area (Ab*s) | Baseline Heigth (Ab) | Absolute Heigth (Ab) | Hit Name         | Quality |
|---------------------|----------|-----------------|-------------|----------------------|----------------------|------------------|---------|
| 1                   | 1.71     | 415             | 394168      | 27884                | 35769                | Nitrous oxide    | 2       |
|                     |          |                 |             |                      |                      | Nitrous oxide    | 2       |
|                     |          |                 |             |                      |                      | Carbon dioxide   | 2       |
| 2                   | 1.745    | 424             | 147856      | 7426                 | 15317                | Hydrogen sulfide | 64      |
|                     |          |                 |             |                      |                      | Phosphine        | 7       |
|                     |          |                 |             |                      |                      | Ethylene oxide   | 3       |
| 3                   | 1.843    | 449             | 98079       | 4812                 | 12716                | 2-Butene, (E)-   | 50      |
|                     |          |                 |             |                      |                      | 1-Butene         | 50      |
|                     |          |                 |             |                      |                      | 2-Butene         | 50      |
| 4                   | 1.917    | 468             | 171248      | 5212                 | 13127                | Ethane, fluoro-  | 5       |
|                     |          |                 |             |                      |                      | Ethane, fluoro-  | 5       |
|                     |          |                 |             |                      |                      | Hydroxylamine, ( | 4       |
| 5                   | 2.237    | 550             | 98569       | 2282                 | 10243                | 2-Pentene        | 59      |
|                     |          |                 |             |                      |                      | Cyclopropane, 1, | 59      |

|    |       |      |         |       |                         |    |
|----|-------|------|---------|-------|-------------------------|----|
|    |       |      |         |       | 2-Pentene, (Z)-         | 59 |
| 6  | 2.347 | 578  | 157333  | 3989  | 11966 Acetone           | 7  |
|    |       |      |         |       | Acetone                 | 5  |
|    |       |      |         |       | Acetone                 | 5  |
| 7  | 2.448 | 604  | 93399   | 2466  | 10457 Acetone           | 4  |
|    |       |      |         |       | Acetone                 | 3  |
|    |       |      |         |       | Acetone                 | 3  |
| 8  | 3.336 | 831  | 314255  | 5186  | 13306 Methane, isocya   | 9  |
|    |       |      |         |       | Methane, isocya         | 9  |
|    |       |      |         |       | 1-Propanol, 2,2-c       | 9  |
| 9  | 3.633 | 907  | 365008  | 10964 | 19126 1-Pentene, 2,4,4- | 86 |
|    |       |      |         |       | 1-Pentene, 2,4,4-       | 80 |
|    |       |      |         |       | 2-Hexene, 5,5-di        | 72 |
| 10 | 3.871 | 968  | 154940  | 6488  | 14685 Cyclohexane, 1,3  | 90 |
|    |       |      |         |       | 2-Pentene, 2,4,4-       | 90 |
|    |       |      |         |       | Cyclohexane, 1,3        | 86 |
| 11 | 4.195 | 1051 | 282600  | 10216 | 18538 1H-Pyrrole, 1-me  | 80 |
|    |       |      |         |       | 1H-Pyrrole, 1-me        | 72 |
|    |       |      |         |       | 1H-Pyrrole, 3-me        | 9  |
|    |       |      |         |       | Toluene                 | 94 |
|    |       |      |         |       | Toluene                 | 91 |
| 13 | 5.473 | 1378 | 9435045 | 64198 | 73570 Toluene           | 91 |
|    |       |      |         |       | Toluene                 | 91 |
|    |       |      |         |       | Toluene                 | 91 |
| 14 | 5.767 | 1453 | 4010359 | 45714 | 55329 Toluene           | 91 |
|    |       |      |         |       | Toluene                 | 91 |
|    |       |      |         |       | Toluene                 | 91 |
| 15 | 5.919 | 1492 | 3650523 | 39067 | 48806 Toluene           | 91 |
|    |       |      |         |       | Toluene                 | 91 |
|    |       |      |         |       | Toluene                 | 90 |
| 16 | 6.099 | 1538 | 1965071 | 32990 | 42876 Toluene           | 91 |
|    |       |      |         |       | Toluene                 | 91 |
|    |       |      |         |       | Toluene                 | 91 |
| 17 | 6.196 | 1563 | 1689564 | 29787 | 39755 Toluene           | 91 |
|    |       |      |         |       | Toluene                 | 91 |
|    |       |      |         |       | Toluene                 | 91 |
| 18 | 6.298 | 1589 | 743739  | 27366 | 37418 Toluene           | 91 |
|    |       |      |         |       | Toluene                 | 91 |
|    |       |      |         |       | Toluene                 | 90 |
| 19 | 6.345 | 1601 | 639489  | 27027 | 37116 Toluene           | 91 |
|    |       |      |         |       | Toluene                 | 91 |
|    |       |      |         |       | Toluene                 | 91 |
| 20 | 6.384 | 1611 | 1039213 | 25142 | 35263 Toluene           | 91 |
|    |       |      |         |       | Spiro[2,4]hepta-        | 90 |
|    |       |      |         |       | Toluene                 | 87 |
| 21 | 6.454 | 1629 | 1662699 | 24373 | 34552 Toluene           | 91 |

|    |       |      |        |       |                   |    |
|----|-------|------|--------|-------|-------------------|----|
|    |       |      |        |       | Toluene           | 91 |
|    |       |      |        |       | Toluene           | 91 |
| 22 | 6.587 | 1663 | 548584 | 21448 | 31736 Toluene     | 91 |
|    |       |      |        |       | Toluene           | 91 |
|    |       |      |        |       | Toluene           | 91 |
| 23 | 6.626 | 1673 | 498644 | 21182 | 31502 Toluene     | 91 |
|    |       |      |        |       | Toluene           | 91 |
|    |       |      |        |       | Toluene           | 91 |
| 24 | 6.669 | 1684 | 336831 | 20010 | 30365 Toluene     | 91 |
|    |       |      |        |       | Toluene           | 90 |
|    |       |      |        |       | Toluene           | 90 |
| 25 | 6.701 | 1692 | 611861 | 19769 | 30149 Toluene     | 91 |
|    |       |      |        |       | 1,3,5-Cyclohepta  | 86 |
|    |       |      |        |       | Toluene           | 83 |
| 26 | 6.748 | 1704 | 532507 | 19259 | 29680 Toluene     | 91 |
|    |       |      |        |       | Toluene           | 91 |
|    |       |      |        |       | Toluene           | 90 |
| 27 | 6.798 | 1717 | 246383 | 18567 | 29030 Toluene     | 91 |
|    |       |      |        |       | Toluene           | 90 |
|    |       |      |        |       | Toluene           | 80 |
| 28 | 6.822 | 1723 | 320637 | 18478 | 28957 Toluene     | 90 |
|    |       |      |        |       | Tetracyclo[3.2.0. | 80 |
|    |       |      |        |       | 1,3,5-Cyclohepta  | 80 |
| 29 | 6.849 | 1730 | 645791 | 18483 | 28987 Toluene     | 86 |
|    |       |      |        |       | Toluene           | 83 |
|    |       |      |        |       | 1,3,5-Cyclohepta  | 83 |
| 30 | 6.92  | 1748 | 601876 | 17735 | 28297 Toluene     | 91 |
|    |       |      |        |       | Toluene           | 90 |
|    |       |      |        |       | Toluene           | 86 |
| 31 | 6.97  | 1761 | 808544 | 16846 | 27449 Toluene     | 91 |
|    |       |      |        |       | Toluene           | 91 |
|    |       |      |        |       | Toluene           | 90 |
| 32 | 7.06  | 1784 | 595757 | 15271 | 25949 Toluene     | 91 |
|    |       |      |        |       | Toluene           | 91 |
|    |       |      |        |       | Toluene           | 90 |
| 33 | 7.138 | 1804 | 286993 | 15165 | 25908 Toluene     | 91 |
|    |       |      |        |       | Toluene           | 91 |
|    |       |      |        |       | Toluene           | 91 |
| 34 | 7.158 | 1809 | 440557 | 14366 | 25123 Toluene     | 90 |
|    |       |      |        |       | Toluene           | 80 |
|    |       |      |        |       | Toluene           | 80 |
| 35 | 7.217 | 1824 | 608733 | 13770 | 24576 Toluene     | 91 |
|    |       |      |        |       | Toluene           | 91 |
|    |       |      |        |       | Toluene           | 91 |
| 36 | 7.33  | 1853 | 162826 | 12673 | 23570 Toluene     | 90 |
|    |       |      |        |       | Toluene           | 90 |
|    |       |      |        |       | Toluene           | 90 |

|    |       |      |        |       |       |                  |    |
|----|-------|------|--------|-------|-------|------------------|----|
| 37 | 7.349 | 1858 | 97602  | 12222 | 23137 | Toluene          | 90 |
|    |       |      |        |       |       | Toluene          | 86 |
|    |       |      |        |       |       | Toluene          | 86 |
| 38 | 7.361 | 1861 | 164778 | 12269 | 23193 | Toluene          | 90 |
|    |       |      |        |       |       | Toluene          | 86 |
|    |       |      |        |       |       | Toluene          | 83 |
| 39 | 7.389 | 1868 | 369108 | 11530 | 22478 | Toluene          | 91 |
|    |       |      |        |       |       | Toluene          | 86 |
|    |       |      |        |       |       | Toluene          | 86 |
| 40 | 7.451 | 1884 | 643702 | 11872 | 22868 | Toluene          | 91 |
|    |       |      |        |       |       | Toluene          | 90 |
|    |       |      |        |       |       | Toluene          | 86 |
| 41 | 7.545 | 1908 | 279792 | 10412 | 21488 | Toluene          | 90 |
|    |       |      |        |       |       | Toluene          | 90 |
|    |       |      |        |       |       | Toluene          | 90 |
| 42 | 7.592 | 1920 | 246742 | 10209 | 21324 | Toluene          | 86 |
|    |       |      |        |       |       | Toluene          | 86 |
|    |       |      |        |       |       | Toluene          | 86 |
| 43 | 7.646 | 1934 | 173127 | 10039 | 21198 | Toluene          | 90 |
|    |       |      |        |       |       | Toluene          | 90 |
|    |       |      |        |       |       | Toluene          | 90 |
| 44 | 7.674 | 1941 | 156046 | 9374  | 20554 | Spiro[2,4]hepta- | 90 |
|    |       |      |        |       |       | Toluene          | 90 |
|    |       |      |        |       |       | Toluene          | 86 |
| 45 | 7.693 | 1946 | 284634 | 9181  | 20379 | Toluene          | 90 |
|    |       |      |        |       |       | Toluene          | 90 |
|    |       |      |        |       |       | Toluene          | 90 |
| 46 | 7.764 | 1964 | 148713 | 8345  | 19598 | Toluene          | 90 |
|    |       |      |        |       |       | Toluene          | 86 |
|    |       |      |        |       |       | Toluene          | 80 |
| 47 | 7.783 | 1969 | 133705 | 8754  | 20026 | Toluene          | 90 |
|    |       |      |        |       |       | Toluene          | 90 |
|    |       |      |        |       |       | Toluene          | 90 |
| 48 | 7.822 | 1979 | 271125 | 8506  | 19808 | Toluene          | 90 |
|    |       |      |        |       |       | Toluene          | 90 |
|    |       |      |        |       |       | Spiro[2,4]hepta- | 83 |
| 49 | 7.885 | 1995 | 146929 | 7541  | 18896 | Toluene          | 90 |
|    |       |      |        |       |       | Toluene          | 90 |
|    |       |      |        |       |       | Toluene          | 90 |
| 50 | 7.916 | 2003 | 282518 | 7267  | 18645 | Toluene          | 90 |
|    |       |      |        |       |       | Toluene          | 90 |
|    |       |      |        |       |       | Toluene          | 90 |
| 51 | 7.979 | 2019 | 151436 | 6981  | 18414 | Toluene          | 90 |
|    |       |      |        |       |       | Toluene          | 90 |
|    |       |      |        |       |       | Toluene          | 90 |
| 52 | 8.022 | 2030 | 91266  | 6620  | 18085 | Toluene          | 90 |
|    |       |      |        |       |       | Toluene          | 90 |

|    |       |      |        |      |       |                  |    |
|----|-------|------|--------|------|-------|------------------|----|
|    |       |      |        |      |       | Toluene          | 83 |
| 53 | 8.053 | 2038 | 178072 | 6665 | 18159 | Toluene          | 78 |
|    |       |      |        |      |       | Toluene          | 78 |
|    |       |      |        |      |       | Toluene          | 78 |
| 54 | 8.135 | 2059 | 238171 | 6684 | 18243 | Toluene          | 80 |
|    |       |      |        |      |       | Toluene          | 80 |
|    |       |      |        |      |       | Toluene          | 80 |
| 55 | 8.155 | 2064 | 171561 | 7024 | 18600 | Toluene          | 72 |
|    |       |      |        |      |       | Toluene          | 72 |
|    |       |      |        |      |       | Toluene          | 72 |
| 56 | 8.201 | 2076 | 81309  | 6842 | 18457 | Toluene          | 64 |
|    |       |      |        |      |       | Toluene          | 64 |
|    |       |      |        |      |       | Toluene          | 42 |
| 57 | 8.233 | 2084 | 97096  | 6609 | 18247 | Toluene          | 72 |
|    |       |      |        |      |       | Spiro[2,4]hepta- | 59 |
|    |       |      |        |      |       | Toluene          | 53 |
| 58 | 8.248 | 2088 | 107310 | 6860 | 18514 | Toluene          | 80 |
|    |       |      |        |      |       | Spiro[2,4]hepta- | 80 |
|    |       |      |        |      |       | Toluene          | 80 |
| 59 | 8.291 | 2099 | 152747 | 6642 | 18329 | Toluene          | 72 |
|    |       |      |        |      |       | Toluene          | 64 |
|    |       |      |        |      |       | Toluene          | 64 |
| 60 | 8.37  | 2119 | 193209 | 6229 | 17981 | Toluene          | 80 |
|    |       |      |        |      |       | Toluene          | 80 |
|    |       |      |        |      |       | Toluene          | 80 |
| 61 | 8.389 | 2124 | 86131  | 5859 | 17626 | Toluene          | 64 |
|    |       |      |        |      |       | Toluene          | 64 |
|    |       |      |        |      |       | Toluene          | 64 |
| 62 | 8.42  | 2132 | 140250 | 5793 | 17586 | Toluene          | 64 |
|    |       |      |        |      |       | Toluene          | 64 |
|    |       |      |        |      |       | Toluene          | 59 |
| 63 | 8.588 | 2175 | 360618 | 7455 | 19386 | Toluene          | 58 |
|    |       |      |        |      |       | Toluene          | 58 |
|    |       |      |        |      |       | Toluene          | 58 |
| 64 | 8.631 | 2186 | 147065 | 8427 | 20395 | Spiro[3.3]hepta- | 50 |
|    |       |      |        |      |       | Cyclobutene, 2-p | 50 |
|    |       |      |        |      |       | Spiro[2,4]hepta- | 50 |
| 65 | 8.674 | 2197 | 231164 | 7982 | 19985 | 1,3,5-Cyclohepta | 72 |
|    |       |      |        |      |       | Toluene          | 59 |
|    |       |      |        |      |       | Toluene          | 59 |
| 66 | 8.713 | 2207 | 99132  | 7643 | 19680 | 1,3,5-Cyclohepta | 64 |
|    |       |      |        |      |       | Spiro[2,4]hepta- | 64 |
|    |       |      |        |      |       | Toluene          | 64 |
| 67 | 8.737 | 2213 | 501471 | 7686 | 19739 | Toluene          | 50 |
|    |       |      |        |      |       | Spiro[2,4]hepta- | 50 |
|    |       |      |        |      |       | Toluene          | 38 |
| 68 | 8.874 | 2248 | 177303 | 7210 | 19375 | Toluene          | 53 |

|    |       |      |        |      |       |                   |    |
|----|-------|------|--------|------|-------|-------------------|----|
|    |       |      |        |      |       | Spiro[2,4]hepta-  | 53 |
|    |       |      |        |      |       | Toluene           | 38 |
| 69 | 8.917 | 2259 | 177121 | 6859 | 19062 | Toluene           | 64 |
|    |       |      |        |      |       | Toluene           | 64 |
|    |       |      |        |      |       | Cyclobutene, 2-p  | 59 |
| 70 | 8.956 | 2269 | 155985 | 6763 | 18997 | Toluene           | 64 |
|    |       |      |        |      |       | Toluene           | 64 |
|    |       |      |        |      |       | Spiro[2,4]hepta-  | 64 |
| 71 | 9.003 | 2281 | 170995 | 5799 | 18071 | Toluene           | 40 |
|    |       |      |        |      |       | Bicyclo[3.2.0]hep | 9  |
|    |       |      |        |      |       | 1,6-Heptadien-3-  | 9  |
| 72 | 9.057 | 2295 | 122115 | 6174 | 18491 | Toluene           | 64 |
|    |       |      |        |      |       | Spiro[2,4]hepta-  | 59 |
|    |       |      |        |      |       | Toluene           | 59 |
| 73 | 9.077 | 2300 | 89755  | 6345 | 18680 | Toluene           | 58 |
|    |       |      |        |      |       | Cyclobutene, 2-p  | 53 |
|    |       |      |        |      |       | Spiro[2,4]hepta-  | 53 |
| 74 | 9.112 | 2309 | 91865  | 6386 | 18749 | Benzyl oxy tridec | 53 |
|    |       |      |        |      |       | Toluene           | 49 |
|    |       |      |        |      |       | Toluene           | 49 |
| 75 | 9.136 | 2315 | 298033 | 6392 | 18773 | Benzyl oxy tridec | 50 |
|    |       |      |        |      |       | Toluene           | 49 |
|    |       |      |        |      |       | 1,3,5-Cyclohepta  | 49 |
| 76 | 9.296 | 2356 | 477573 | 7935 | 20450 | Toluene           | 43 |
|    |       |      |        |      |       | Toluene           | 43 |
|    |       |      |        |      |       | Benzyl oxy tridec | 42 |
| 77 | 9.335 | 2366 | 110740 | 8283 | 20827 | Toluene           | 38 |
|    |       |      |        |      |       | Toluene           | 38 |
|    |       |      |        |      |       | Toluene           | 38 |
| 78 | 9.362 | 2373 | 381722 | 8540 | 21108 | Toluene           | 43 |
|    |       |      |        |      |       | Toluene           | 38 |
|    |       |      |        |      |       | Cyclobutene, 2-p  | 38 |
| 79 | 9.444 | 2394 | 128384 | 7910 | 20544 | Benzyl oxy tridec | 72 |
|    |       |      |        |      |       | Toluene           | 47 |
|    |       |      |        |      |       | Spiro[2,4]hepta-  | 47 |
| 80 | 9.479 | 2403 | 147748 | 7480 | 20144 | Benzyl oxy tridec | 50 |
|    |       |      |        |      |       | Toluene           | 49 |
|    |       |      |        |      |       | 1,3,5-Cyclohepta  | 49 |
| 81 | 9.522 | 2414 | 171391 | 7183 | 19883 | Toluene           | 52 |
|    |       |      |        |      |       | Toluene           | 50 |
|    |       |      |        |      |       | Toluene           | 50 |
| 82 | 9.558 | 2423 | 206585 | 6436 | 19166 | Benzyl oxy tridec | 53 |
|    |       |      |        |      |       | Toluene           | 49 |
|    |       |      |        |      |       | Toluene           | 49 |
| 83 | 9.616 | 2438 | 228718 | 6417 | 19191 | Benzyl oxy tridec | 59 |
|    |       |      |        |      |       | Toluene           | 52 |
|    |       |      |        |      |       | Toluene           | 52 |

|    |        |      |        |      |       |                    |    |
|----|--------|------|--------|------|-------|--------------------|----|
| 84 | 9.687  | 2456 | 118921 | 5156 | 17991 | Toluene            | 50 |
|    |        |      |        |      |       | Toluene            | 50 |
|    |        |      |        |      |       | Toluene            | 50 |
| 85 | 9.726  | 2466 | 72658  | 5219 | 18084 | Toluene            | 52 |
|    |        |      |        |      |       | Toluene            | 50 |
|    |        |      |        |      |       | 1,3,5-Cyclohepta   | 49 |
| 86 | 9.749  | 2472 | 107023 | 5323 | 18209 | Benzyl oxy tridec  | 59 |
|    |        |      |        |      |       | Toluene            | 50 |
|    |        |      |        |      |       | Toluene            | 50 |
| 87 | 9.808  | 2487 | 105388 | 4665 | 17598 | Toluene            | 38 |
|    |        |      |        |      |       | Toluene            | 37 |
|    |        |      |        |      |       | Benzyl oxy tridec  | 33 |
| 88 | 9.835  | 2494 | 89576  | 4242 | 17199 | 1,3,5-Cyclohepta   | 49 |
|    |        |      |        |      |       | Toluene            | 49 |
|    |        |      |        |      |       | Toluene            | 49 |
| 89 | 9.886  | 2507 | 74402  | 4138 | 17136 | Toluene            | 52 |
|    |        |      |        |      |       | Toluene            | 50 |
|    |        |      |        |      |       | Toluene            | 50 |
| 90 | 10.136 | 2571 | 92571  | 3979 | 17183 | Toluene            | 46 |
|    |        |      |        |      |       | Toluene            | 43 |
|    |        |      |        |      |       | Toluene            | 43 |
| 91 | 10.253 | 2601 | 90578  | 4215 | 17515 | Toluene            | 38 |
|    |        |      |        |      |       | Toluene            | 30 |
|    |        |      |        |      |       | Toluene            | 30 |
| 92 | 10.328 | 2620 | 108874 | 4324 | 17685 | Toluene            | 49 |
|    |        |      |        |      |       | Toluene            | 47 |
|    |        |      |        |      |       | Toluene            | 47 |
| 93 | 10.425 | 2645 | 109468 | 4081 | 17521 | Benzene, (butox)   | 38 |
|    |        |      |        |      |       | Toluene            | 35 |
|    |        |      |        |      |       | Toluene            | 25 |
| 94 | 10.546 | 2676 | 147605 | 4585 | 18123 | 9,10-Epoxy-4,8-e   | 17 |
|    |        |      |        |      |       | Toluene            | 16 |
|    |        |      |        |      |       | Tricyclo[3.2.1.0(2 | 12 |
| 95 | 10.578 | 2684 | 87329  | 4789 | 18356 | Toluene            | 30 |
|    |        |      |        |      |       | Toluene            | 27 |
|    |        |      |        |      |       | Toluene            | 27 |
| 96 | 10.601 | 2690 | 90216  | 4246 | 17833 | 1-Cyclopentene,    | 25 |
|    |        |      |        |      |       | 7-Methylenebicy    | 23 |
|    |        |      |        |      |       | Tricyclo[3.2.1.0(2 | 23 |
| 97 | 10.632 | 2698 | 76055  | 4519 | 18131 | 7-Methylenebicy    | 25 |
|    |        |      |        |      |       | 9,10-Epoxy-4,8-e   | 12 |
|    |        |      |        |      |       | Tricyclo[3.2.1.0(2 | 12 |
| 98 | 10.679 | 2710 | 97911  | 4441 | 18090 | 2-Allylpent-4-enc  | 22 |
|    |        |      |        |      |       | 7-Methylenebicy    | 17 |
|    |        |      |        |      |       | 1-Cyclopentene,    | 12 |
| 99 | 10.738 | 2725 | 286549 | 4125 | 17824 | Toluene            | 43 |
|    |        |      |        |      |       | Toluene            | 43 |

|     |        |      |         |       |       |                    |    |
|-----|--------|------|---------|-------|-------|--------------------|----|
|     |        |      |         |       |       | Toluene            | 38 |
| 100 | 11.215 | 2847 | 112012  | 3668  | 17758 | 1,5-Heptadien-3-   | 25 |
|     |        |      |         |       |       | Toluene            | 22 |
|     |        |      |         |       |       | Toluene            | 12 |
| 101 | 11.262 | 2859 | 83645   | 4152  | 18279 | Toluene            | 22 |
|     |        |      |         |       |       | Toluene            | 22 |
|     |        |      |         |       |       | 1,3,5-Cyclohepta   | 22 |
| 102 | 11.289 | 2866 | 224974  | 4426  | 18578 | 1,5-Dimethyl-1,4   | 38 |
|     |        |      |         |       |       | Benzene, [(2-pro   | 25 |
|     |        |      |         |       |       | L-Glutamic acid,   | 25 |
| 103 | 11.477 | 2914 | 358878  | 5374  | 19677 | Toluene            | 25 |
|     |        |      |         |       |       | Toluene            | 25 |
|     |        |      |         |       |       | Toluene            | 22 |
| 104 | 11.578 | 2940 | 482224  | 4914  | 19301 | Pyridinium, 1-am   | 35 |
|     |        |      |         |       |       | Pyridine, 3-ethyl- | 22 |
|     |        |      |         |       |       | Pyrimidine, 2,4-c  | 22 |
| 105 | 11.801 | 2997 | 288024  | 4674  | 19244 | (1,2,2-trimethyl-  | 38 |
|     |        |      |         |       |       | 1H-Pyrazole, 1-m   | 38 |
|     |        |      |         |       |       | .alpha.-Camphol    | 38 |
| 106 | 11.86  | 3012 | 164659  | 4815  | 19434 | Hydrazine, phen    | 49 |
|     |        |      |         |       |       | 1H-Pyrazole, 1-m   | 43 |
|     |        |      |         |       |       | 2-Pyridinamine, l  | 35 |
| 107 | 11.922 | 3028 | 101749  | 3303  | 17975 | 2,3,4-Hexatriene   | 32 |
|     |        |      |         |       |       | Pyrimidine, 4,5-c  | 30 |
|     |        |      |         |       |       | 3-Acetyl-1-methyl  | 25 |
| 108 | 11.985 | 3044 | 75531   | 3589  | 18312 | Toluene            | 35 |
|     |        |      |         |       |       | 2,3,4-Hexatriene   | 27 |
|     |        |      |         |       |       | Toluene            | 25 |
| 109 | 12.055 | 3062 | 97871   | 3554  | 18334 | cis-Pinen-3-ol     | 38 |
|     |        |      |         |       |       | Bicyclo[3.1.0]hex  | 35 |
|     |        |      |         |       |       | Benzene, [(2-pro   | 32 |
| 110 | 12.102 | 3074 | 362496  | 4093  | 18910 | 3-Thujen-2-ol, st  | 38 |
|     |        |      |         |       |       | Bicyclo[3.1.0]hex  | 35 |
|     |        |      |         |       |       | Myrtenyl acetate   | 23 |
| 111 | 12.458 | 3165 | 220251  | 3414  | 18633 | Silane, (4-methyl  | 30 |
|     |        |      |         |       |       | Benzene, (methc    | 27 |
|     |        |      |         |       |       | Pyrazine, 2-ethyl  | 25 |
| 112 | 12.774 | 3246 | 1140564 | 9689  | 25574 | 3-Pyridinamine, :  | 49 |
|     |        |      |         |       |       | 4-Pyridinamine, :  | 47 |
|     |        |      |         |       |       | 3-Pyridinamine, :  | 46 |
| 113 | 12.888 | 3275 | 1572088 | 9607  | 25726 | 3-Pyridinamine, :  | 30 |
|     |        |      |         |       |       | 3-Pyridinamine, :  | 30 |
|     |        |      |         |       |       | Bicyclo[2.2.1]hep  | 27 |
| 114 | 13.192 | 3353 | 195394  | 6109  | 22868 | Borolo[1,2-a]bor   | 38 |
|     |        |      |         |       |       | Phenylethyl Alco   | 14 |
|     |        |      |         |       |       | 1,5-Heptadien-3-   | 11 |
| 115 | 13.349 | 3393 | 1507874 | 11851 | 28942 | 3-Pyridinamine, l  | 14 |



|     |        |      |         |       |                         |    |
|-----|--------|------|---------|-------|-------------------------|----|
|     |        |      |         |       | Acetic acid, trich      | 11 |
|     |        |      |         |       | 1-Octanol               | 11 |
| 116 | 13.607 | 3459 | 231154  | 7435  | 25065 1H-Pyrrole, 2,3,4 | 49 |
|     |        |      |         |       | 1H-Pyrrole, 4-ethyl     | 38 |
|     |        |      |         |       | 1H-Pyrrole, 3-ethyl     | 35 |
| 117 | 13.81  | 3511 | 1526612 | 9377  | 27439 Borolo[1,2-a]bor  | 46 |
|     |        |      |         |       | N-(2-Propynyl)-N        | 35 |
|     |        |      |         |       | Borazine, 2,4-din       | 35 |
| 118 | 14.158 | 3600 | 951050  | 8845  | 27635 5H-Inden-5-one,   | 30 |
|     |        |      |         |       | 1,2,3,5,6,7-Hexal       | 27 |
|     |        |      |         |       | Pyridinium, 1-arr       | 22 |
| 119 | 14.216 | 3615 | 826238  | 8668  | 27581 2-Methyl-3-isopr  | 50 |
|     |        |      |         |       | 2,5-Dimethyl-1-p        | 38 |
|     |        |      |         |       | 5H-Inden-5-one,         | 38 |
| 120 | 14.4   | 3662 | 470103  | 6509  | 25813 Pyridinium, 1-arr | 35 |
|     |        |      |         |       | 2,5-Dimethyl-1-p        | 30 |
|     |        |      |         |       | 5H-Inden-5-one,         | 30 |
| 121 | 14.564 | 3704 | 104602  | 4166  | 23810 Pyridinium, 1-arr | 41 |
|     |        |      |         |       | Benzenamine, 4-         | 35 |
|     |        |      |         |       | Benzene, 1-etho:        | 25 |
| 122 | 14.623 | 3719 | 145338  | 4816  | 24584 Pyrazine, 2-(n-pr | 38 |
|     |        |      |         |       | 1H-Imidazole-4-c        | 35 |
|     |        |      |         |       | 1,2,5-Trimethylp        | 27 |
| 123 | 14.67  | 3731 | 147151  | 4927  | 24795 Pyridinium, 1-arr | 41 |
|     |        |      |         |       | 1H-Pyrrole, 2,3,4       | 38 |
|     |        |      |         |       | 4,5,6,6a-Tetrahy        | 35 |
| 124 | 14.854 | 3778 | 652679  | 7129  | 27384 2,5-Dimethyl-1-p  | 46 |
|     |        |      |         |       | Borolo[1,2-a]bor        | 30 |
|     |        |      |         |       | Pyrazine, 2-(n-pr       | 27 |
| 125 | 14.92  | 3795 | 344085  | 6748  | 27137 2,5-Dimethyl-1-p  | 46 |
|     |        |      |         |       | Furan, 3-(4-meth        | 38 |
|     |        |      |         |       | 4,5,6,6a-Tetrahy        | 25 |
| 126 | 15.096 | 3840 | 469910  | 9309  | 30072 Phenol, 4-(ethyla | 47 |
|     |        |      |         |       | m-Ethylaminoph          | 46 |
|     |        |      |         |       | p-Cresidine             | 46 |
| 127 | 15.182 | 3862 | 1339630 | 10615 | 31557 2-Butanamine, N   | 47 |
|     |        |      |         |       | Pyrazole, 1-vinyl-      | 41 |
|     |        |      |         |       | Phenol, 4-(ethyla       | 38 |
| 128 | 15.393 | 3916 | 437198  | 8837  | 30226 2,5-Dimethyl-1-p  | 38 |
|     |        |      |         |       | Benzenamine, 4-         | 25 |
|     |        |      |         |       | 2-(1-Ethylpropyl)       | 25 |
| 129 | 15.584 | 3965 | 1103181 | 13665 | 35452 2-Butanamine, N   | 52 |
|     |        |      |         |       | Benzene, 1-meth         | 41 |
|     |        |      |         |       | m-Ethylaminoph          | 38 |
| 130 | 15.643 | 3980 | 455126  | 12105 | 34018 Benzene, 1-meth   | 38 |
|     |        |      |         |       | Benzene, 1-meth         | 30 |
|     |        |      |         |       | Naphthalene, 5-f        | 25 |

|     |        |      |         |       |                           |    |
|-----|--------|------|---------|-------|---------------------------|----|
| 131 | 15.752 | 4008 | 656310  | 11912 | 34057 Phenol, 2-methy     | 53 |
|     |        |      |         |       | m-Ethylaminoph            | 45 |
|     |        |      |         |       | 1H-Pyrrole, 2-etr         | 43 |
| 132 | 15.862 | 4036 | 1253295 | 11665 | 34038 2H-Quinolizine, 1   | 49 |
|     |        |      |         |       | Benzene, 1-etho:          | 43 |
|     |        |      |         |       | Benzene, 1-etho:          | 43 |
| 133 | 16.092 | 4095 | 602388  | 7706  | 30565 p-Cresol            | 35 |
|     |        |      |         |       | Phenol, 2-methy           | 35 |
|     |        |      |         |       | 3-Hydroxy-2-met           | 25 |
| 134 | 16.315 | 4152 | 1016959 | 9258  | 32579 5-Ethoxy-2-oxira    | 38 |
|     |        |      |         |       | Benzene, 1-etho:          | 35 |
|     |        |      |         |       | 5H-Inden-5-one,           | 30 |
| 135 | 16.542 | 4210 | 332171  | 7393  | 31197 Benzene, 1-etho:    | 49 |
|     |        |      |         |       | Benzene, 1-etho:          | 47 |
|     |        |      |         |       | Benzene, 1-etho:          | 43 |
| 136 | 16.604 | 4226 | 281273  | 6616  | 30551 Benzene, 1-etho:    | 43 |
|     |        |      |         |       | Benzene, 1-etho:          | 43 |
|     |        |      |         |       | 1H-Pyrazole, 1-r          | 38 |
| 137 | 16.773 | 4269 | 592948  | 10445 | 34729 Benzene, 1-etho:    | 41 |
|     |        |      |         |       | Benzene, 1-etho:          | 41 |
|     |        |      |         |       | Benzenamine, 4-           | 30 |
| 138 | 16.862 | 4292 | 743270  | 13830 | 38308 Phenol, 2-amino:    | 41 |
|     |        |      |         |       | Ammonium, (p-h            | 38 |
|     |        |      |         |       | Benzenamine, 4-           | 38 |
| 139 | 16.917 | 4306 | 520684  | 12244 | 36835 4-t-Butyl pyridine  | 35 |
|     |        |      |         |       | Ammonium, (p-h            | 35 |
|     |        |      |         |       | Benzene, 1-etho:          | 30 |
| 140 | 17.038 | 4337 | 820982  | 10573 | 35420 Naphthalene-D8      | 38 |
|     |        |      |         |       | 2-(N-Methyl-N-e           | 27 |
|     |        |      |         |       | Phenol, 2-amino:          | 27 |
| 141 | 17.316 | 4408 | 1285827 | 12727 | 38158 Tropolidine, 2-acet | 46 |
|     |        |      |         |       | 4-Isopropyl-3,4-c         | 38 |
|     |        |      |         |       | Benzene, 1-meth           | 38 |
| 142 | 17.41  | 4432 | 162512  | 9457  | 35085 5H-Inden-5-one,     | 49 |
|     |        |      |         |       | 1,2-Benzenediar           | 45 |
|     |        |      |         |       | Phenol, 3-ethyl-          | 38 |
| 143 | 17.503 | 4456 | 1356232 | 23735 | 49559 Benzene, 1-etho:    | 42 |
|     |        |      |         |       | Phenol, 2,3-dime          | 38 |
|     |        |      |         |       | 3-Cyclohex-1-eny          | 35 |
| 144 | 17.578 | 4475 | 1263279 | 24898 | 50874 2(3H)-Naphthale     | 38 |
|     |        |      |         |       | Benzene, 1-meth           | 30 |
|     |        |      |         |       | Naphthalene, 6-f          | 30 |
| 145 | 17.679 | 4501 | 999553  | 13427 | 39615 Benzene, 1-meth     | 43 |
|     |        |      |         |       | Phenol, 4-methy           | 38 |
|     |        |      |         |       | Phenol, 2,4-dime          | 35 |
| 146 | 17.925 | 4564 | 696785  | 12377 | 39085 2-Butanamine, N     | 47 |
|     |        |      |         |       | N-(1-Cyclohexen           | 38 |

|     |        |      |         |       |       |                    |    |
|-----|--------|------|---------|-------|-------|--------------------|----|
|     |        |      |         |       |       | Benzeneethanol,    | 30 |
| 147 | 18.051 | 4596 | 1740888 | 12683 | 39658 | 5H-Inden-5-one,    | 43 |
|     |        |      |         |       |       | Phenol, 3-(ethyla  | 43 |
|     |        |      |         |       |       | 2H-Inden-2-one,    | 30 |
| 148 | 18.383 | 4681 | 722496  | 9035  | 36701 | 2(1H)-Pyridinone   | 43 |
|     |        |      |         |       |       | Benzenemethani     | 41 |
|     |        |      |         |       |       | 3-Methoxybenzy     | 38 |
| 149 | 18.602 | 4737 | 1237633 | 10836 | 38962 | 6,7-Dimethyltetra  | 38 |
|     |        |      |         |       |       | 1-Chloro-1-ethoxy  | 38 |
|     |        |      |         |       |       | 5H-Inden-5-one,    | 35 |
| 150 | 18.86  | 4803 | 797543  | 15764 | 44433 | Dodecahydrocar     | 49 |
|     |        |      |         |       |       | Naphthalene-D8     | 43 |
|     |        |      |         |       |       | 4-t-Butyl pyridine | 38 |
| 151 | 18.91  | 4816 | 1076765 | 15075 | 43853 | 6-Ethoxy-9H-pur    | 43 |
|     |        |      |         |       |       | Benzoic acid, o-n  | 43 |
|     |        |      |         |       |       | 6,7-Dimethyltetra  | 38 |
| 152 | 19.063 | 4855 | 513541  | 9083  | 38183 | Borazine, 2,4,6-t  | 46 |
|     |        |      |         |       |       | 1-Chloro-1-ethoxy  | 38 |
|     |        |      |         |       |       | Benzo-1,3,2-oxat   | 27 |
| 153 | 19.153 | 4878 | 363624  | 7147  | 36437 | Benzene, 1-ethoxy  | 35 |
|     |        |      |         |       |       | Acetic acid, phen  | 30 |
|     |        |      |         |       |       | Benzoic acid, o-n  | 27 |
| 154 | 19.274 | 4909 | 98696   | 4514  | 34057 | N-(1-Cyclohexen-   | 25 |
|     |        |      |         |       |       | 2-Acetyl-3-amino   | 25 |
|     |        |      |         |       |       | 2(3H)-Naphthale    | 25 |
| 155 | 19.336 | 4925 | 569517  | 7729  | 37406 | N-(1-Cyclohexen-   | 52 |
|     |        |      |         |       |       | Borazine, 2,4,6-t  | 46 |
|     |        |      |         |       |       | Phenol, 3-(ethyla  | 43 |
| 156 | 19.536 | 4976 | 460764  | 6699  | 36787 | 2(3H)-Naphthale    | 27 |
|     |        |      |         |       |       | Benzoic acid, 2,4  | 27 |
|     |        |      |         |       |       | Acetamide, N-[1-   | 25 |
| 157 | 19.676 | 5012 | 476393  | 10646 | 41036 | 2-Butanamine, N    | 47 |
|     |        |      |         |       |       | Acetamide, N-[1-   | 38 |
|     |        |      |         |       |       | N-(1-Cyclohexen-   | 35 |
| 158 | 19.739 | 5028 | 964446  | 16578 | 47094 | Decane, 1-bromo    | 30 |
|     |        |      |         |       |       | Methoxyacetic a    | 18 |
|     |        |      |         |       |       | Hexadecane, 2,6    | 18 |
| 159 | 19.903 | 5070 | 505484  | 10978 | 41841 | Acetamide, N-[1-   | 38 |
|     |        |      |         |       |       | Dodecahydrocar     | 25 |
|     |        |      |         |       |       | 3,5-Dimethyl-4-a   | 25 |
| 160 | 19.958 | 5084 | 454099  | 10326 | 41303 | 2(3H)-Naphthale    | 38 |
|     |        |      |         |       |       | Phenol, 3-(diethy  | 38 |
|     |        |      |         |       |       | Propylamine, N-[   | 38 |
| 161 | 20.169 | 5138 | 3323442 | 22366 | 53790 | [1,2,4]-Triazolo[1 | 25 |
|     |        |      |         |       |       | m-Ethylaminoph     | 18 |
|     |        |      |         |       |       | Ethanone, 1-(2,4   | 18 |
| 162 | 20.427 | 5204 | 1568156 | 16065 | 48030 | 2-Benzothiazolar   | 38 |

|     |        |      |         |       |                                            |    |
|-----|--------|------|---------|-------|--------------------------------------------|----|
|     |        |      |         |       | Naphthalene, 5-f                           | 35 |
|     |        |      |         |       | 1,2,5-Oxadiazol-5-yl                       | 30 |
| 163 | 20.599 | 5248 | 1165441 | 11293 | 43619 Acetamide, N-(2-<br>N-(2-Propynyl)pi | 27 |
|     |        |      |         |       | Acetamide, N-[1-                           | 25 |
| 164 | 20.868 | 5317 | 494092  | 12230 | 45124 2H-1-Benzopyrar                      | 30 |
|     |        |      |         |       | 1H-Azepine-2,5-c                           | 25 |
|     |        |      |         |       | 5-Pyrimidinecart                           | 18 |
| 165 | 21.021 | 5356 | 1017417 | 12551 | 45764 4,5-Dimethyl-ort                     | 38 |
|     |        |      |         |       | o-Toluic acid, 4-f                         | 35 |
|     |        |      |         |       | 3,5-Dimethylanis                           | 30 |
| 166 | 21.126 | 5383 | 385921  | 11639 | 45076 Benzo-1,3,2-oxat                     | 27 |
|     |        |      |         |       | 3-Methylene-bic                            | 25 |
|     |        |      |         |       | 3,5-Dimethylanis                           | 11 |
| 167 | 21.224 | 5408 | 945850  | 13804 | 47443 4H-1-Benzothiop                      | 27 |
|     |        |      |         |       | 2H-Inden-2-one,                            | 25 |
|     |        |      |         |       | s-Triazolo[4,3-c]p                         | 18 |
| 168 | 21.463 | 5469 | 1982363 | 16366 | 50504 4-Methyl-N-[2-(4                     | 22 |
|     |        |      |         |       | Phenol, 2-(ethyla                          | 22 |
|     |        |      |         |       | Ammonium, (p-h                             | 22 |
| 169 | 21.584 | 5500 | 1743423 | 32652 | 67046 1-Tridecene                          | 89 |
|     |        |      |         |       | 1-Tetradecanol                             | 64 |
|     |        |      |         |       | Cyclohexadecane                            | 58 |
| 170 | 21.666 | 5521 | 1809249 | 33256 | 67826 Pentadecane                          | 60 |
|     |        |      |         |       | 1-Octadecanesul                            | 60 |
|     |        |      |         |       | Pentadecane                                | 49 |
| 171 | 21.92  | 5586 | 1988057 | 19450 | 54549 2-Benzothiazolar                     | 43 |
|     |        |      |         |       | 2-Imino-3-ethylb                           | 27 |
|     |        |      |         |       | Pyrrolidine, 1-(1-                         | 18 |
| 172 | 22.088 | 5629 | 532215  | 12126 | 47585 9-Borabicyclo[3.3.1]                 | 38 |
|     |        |      |         |       | Oxaziridine, 3-(4-                         | 27 |
|     |        |      |         |       | N-(1-Cyclohexen-                           | 25 |
| 173 | 22.17  | 5650 | 150204  | 8810  | 44441 Benzene, 1-meth                      | 35 |
|     |        |      |         |       | Benzene, 1-meth                            | 20 |
|     |        |      |         |       | 1,4-Methanonap                             | 18 |
| 174 | 22.248 | 5670 | 909506  | 13730 | 49526 1,6-Methanonap                       | 38 |
|     |        |      |         |       | 4-Chromanol                                | 35 |
|     |        |      |         |       | Cedrol                                     | 22 |
| 175 | 22.35  | 5696 | 712280  | 11260 | 47261 Thiazolo[3,2-a]py                    | 27 |
|     |        |      |         |       | Histidine, 2-triflu                        | 22 |
|     |        |      |         |       | 9-Borabicyclo[3.3.1]                       | 15 |
| 176 | 22.596 | 5759 | 465706  | 9331  | 45851 Pyrrolidine, 1-(1-                   | 46 |
|     |        |      |         |       | 2-Benzothiazolar                           | 25 |
|     |        |      |         |       | 5,6,7,8-Tetrahyd                           | 25 |
| 177 | 22.647 | 5772 | 362684  | 8343  | 44974 Cyclopentanone,                      | 25 |
|     |        |      |         |       | Benzene, 1-(1-m                            | 15 |
|     |        |      |         |       | 3-Allyl-6-methox                           | 15 |

|     |        |      |         |       |       |                             |    |
|-----|--------|------|---------|-------|-------|-----------------------------|----|
| 178 | 22.784 | 5807 | 2105123 | 40312 | 77230 | Cycloundecane, 1            | 94 |
|     |        |      |         |       |       | Cyclododecane               | 83 |
|     |        |      |         |       |       | Cyclotetradecane            | 83 |
| 179 | 22.873 | 5830 | 706277  | 21983 | 59091 | Acetic acid, 2-methyl-      | 59 |
|     |        |      |         |       |       | 2,5,8-Metheno-2             | 30 |
|     |        |      |         |       |       | 2-Benzothiazolar            | 15 |
| 180 | 22.975 | 5856 | 1202185 | 15999 | 53315 | 2-Pentenoic acid            | 25 |
|     |        |      |         |       |       | 2-Methyl-5-(4-methyl-       | 25 |
|     |        |      |         |       |       | 2(3H)-Naphthalene           | 18 |
| 181 | 23.081 | 5883 | 575725  | 14086 | 51626 | 2-Methyl-5-(1-butyl-        | 46 |
|     |        |      |         |       |       | 1H-Indole, 5,7-dimethyl-    | 38 |
|     |        |      |         |       |       | Benzenamine, N-(2-          | 18 |
| 182 | 23.272 | 5932 | 1177194 | 11791 | 49736 | Phenol, 2-methyl-           | 25 |
|     |        |      |         |       |       | 3H-Indole, 2-ethyl-         | 25 |
|     |        |      |         |       |       | Phenol, 2-methyl-           | 11 |
| 183 | 23.436 | 5974 | 661749  | 9629  | 47916 | Isoquinoline, 1,2-dimethyl- | 22 |
|     |        |      |         |       |       | 2-(1-Cyclohexenyl)-         | 22 |
|     |        |      |         |       |       | 1-tert-Butyl-2-nitro-       | 15 |
| 184 | 23.561 | 6006 | 373811  | 10637 | 49188 | 1-Bromo-1-methyl-2-         | 43 |
|     |        |      |         |       |       | Dibenzothiophene            | 30 |
|     |        |      |         |       |       | 1H-Azepine-2,5-dimethyl-    | 30 |
| 185 | 23.643 | 6027 | 436458  | 12746 | 51468 | Decane, 1-bromodecane       | 18 |
|     |        |      |         |       |       | Decane, 1-bromodecane       | 14 |
|     |        |      |         |       |       | Cyclopentanol, 2-methyl-    | 14 |
| 186 | 23.749 | 6054 | 372499  | 8452  | 47397 | 3,4,5-Trimethyl-1-          | 25 |
|     |        |      |         |       |       | 1H-Azepine-2,5-dimethyl-    | 25 |
|     |        |      |         |       |       | N-(1-Cyclohexenyl)-         | 20 |
| 187 | 23.854 | 6081 | 1019859 | 15440 | 54612 | 2,6-Dimethyl-3,5-dimethyl-  | 35 |
|     |        |      |         |       |       | 1,4-Benzenedimethyl-        | 25 |
|     |        |      |         |       |       | 4(3H)-Pteridinone           | 18 |
| 188 | 23.987 | 6115 | 2130300 | 16297 | 55747 | 4-Isopropylphenyl-          | 27 |
|     |        |      |         |       |       | 1,6-Naphthyridine           | 15 |
|     |        |      |         |       |       | Fumaric acid, 5-ethyl-      | 14 |
| 189 | 24.222 | 6175 | 400323  | 8509  | 48447 | 1H-1,3-Benzimidazole        | 18 |
|     |        |      |         |       |       | Benzene, 1-methyl-          | 15 |
|     |        |      |         |       |       | (2r,3aR,6as,9aS)-           | 14 |
| 190 | 24.3   | 6195 | 250191  | 7170  | 47278 | N-(1-Cyclohexenyl)-         | 51 |
|     |        |      |         |       |       | Pyrrolidine, 1-(1-          | 44 |
|     |        |      |         |       |       | 7-methyl-2,3,4,5-           | 40 |
| 191 | 24.382 | 6216 | 251942  | 6794  | 47069 | Benzenaminium, 2-           | 53 |
|     |        |      |         |       |       | Pentenoic acid              | 38 |
|     |        |      |         |       |       | 9b-Boraphenaler             | 38 |
| 192 | 24.452 | 6234 | 275798  | 7954  | 48383 | Cyclopropane,-1-            | 18 |
|     |        |      |         |       |       | 3-Amino-5-methyl-           | 15 |
|     |        |      |         |       |       | 6-Chloro-2-methyl-          | 14 |
| 193 | 24.636 | 6281 | 791034  | 10677 | 51490 | m-Trifluoromethyl-          | 38 |
|     |        |      |         |       |       | 1-(3,6-Dimethyl-            | 25 |

|     |        |      |         |       |                         |    |
|-----|--------|------|---------|-------|-------------------------|----|
|     |        |      |         |       | 1,4-Dimethyltric        | 25 |
| 194 | 24.695 | 6296 | 363936  | 10885 | 51821 2,2,6.beta.,7-Tet | 25 |
|     |        |      |         |       | 2H-Inden-2-one,         | 25 |
|     |        |      |         |       | m-Trifluorometh         | 15 |
| 195 | 24.785 | 6319 | 594716  | 9875  | 51001 (3-Methyl-1-ben:  | 25 |
|     |        |      |         |       | 12-Oxatetracycl         | 25 |
|     |        |      |         |       | 2,13-Dioxapenta         | 15 |
| 196 | 24.894 | 6347 | 209427  | 8565  | 49918 2-Methyl-5-(hex)  | 38 |
|     |        |      |         |       | (3-Chloro-5-fluor       | 30 |
|     |        |      |         |       | 4H-Pyrrolo[3,2,1        | 25 |
| 197 | 24.992 | 6372 | 669971  | 10636 | 52193 1,3,3-Trimethyl-2 | 25 |
|     |        |      |         |       | 1,2,4-Triazolo[4,:      | 25 |
|     |        |      |         |       | 4H-Pyrrolo[3,2,1        | 25 |
| 198 | 25.101 | 6400 | 732190  | 14774 | 56563 3-Amino-4-meth    | 22 |
|     |        |      |         |       | 4-(3-Hydroxyanil        | 18 |
|     |        |      |         |       | N-(1-Cyclopropyl        | 18 |
| 199 | 25.203 | 6426 | 388365  | 7726  | 49726 1H-Cycloprop[e]:  | 46 |
|     |        |      |         |       | Cyclohexane, 1,2        | 44 |
|     |        |      |         |       | 2(1H)-Naphthale         | 35 |
| 200 | 25.355 | 6465 | 1851775 | 45206 | 87524 Cyclotridecane    | 95 |
|     |        |      |         |       | Cyclododecane           | 95 |
|     |        |      |         |       | Chloroacetic acic       | 93 |
| 201 | 25.426 | 6483 | 1554296 | 31993 | 74466 1,2,3-Oxadiazoli  | 38 |
|     |        |      |         |       | Dodecane                | 35 |
|     |        |      |         |       | Ethanol, 2-(dode        | 25 |
| 202 | 25.594 | 6526 | 586341  | 14061 | 56885 3-(3-Methylbut-3  | 30 |
|     |        |      |         |       | 1H-Indole, 1,2,3-       | 25 |
|     |        |      |         |       | 1-Naphthalenam          | 15 |
| 203 | 25.703 | 6554 | 636576  | 11467 | 54522 1-Naphthalenam    | 25 |
|     |        |      |         |       | 3H-Indole, 2-eth        | 25 |
|     |        |      |         |       | Trimethyl(1-naph        | 22 |
| 204 | 25.828 | 6586 | 705384  | 12765 | 56081 Benzenamine, 4-   | 46 |
|     |        |      |         |       | Pyrrolidine, 1-(3,      | 44 |
|     |        |      |         |       | Diethyl-.alpha.-n       | 43 |
| 205 | 25.895 | 6603 | 739996  | 12149 | 55603 Imidazole, 5-chlc | 30 |
|     |        |      |         |       | 2-Chloro-5-nitrol       | 22 |
|     |        |      |         |       | Quinoline, 2-eth        | 22 |
| 206 | 26.047 | 6642 | 176257  | 5291  | 49068 Benzene, 1-brom   | 25 |
|     |        |      |         |       | Benzene, 1-brom         | 25 |
|     |        |      |         |       | Benzene, 1-brom         | 22 |
| 207 | 26.141 | 6666 | 295496  | 10056 | 54032 Butanoic acid, 3- | 44 |
|     |        |      |         |       | 4-Pentynoic acid        | 15 |
|     |        |      |         |       | Acetic acid, chlor      | 14 |
| 208 | 26.254 | 6695 | 546042  | 11608 | 55818 1,7-Trimethylene  | 41 |
|     |        |      |         |       | 1,1'-Biphenyl, 4-i      | 38 |
|     |        |      |         |       | 1,4-Dimethoxy-2         | 38 |
| 209 | 26.332 | 6715 | 117889  | 6709  | 51085 2-(1-Cyano-3-me   | 42 |

|     |        |      |         |       |        |                                              |    |
|-----|--------|------|---------|-------|--------|----------------------------------------------|----|
|     |        |      |         |       |        | 3-Picolinium, 1-a                            | 30 |
|     |        |      |         |       |        | 9(1H)-Phenanthr                              | 25 |
| 210 | 26.387 | 6729 | 234374  | 9911  | 54403  | 4-Chloro-2-(diethyl<br>Pyrrolidine, 1-(1H)   | 11 |
|     |        |      |         |       |        | Cycloheptan[a]in                             | 10 |
| 211 | 26.465 | 6749 | 1125303 | 18335 | 62990  | 1,7-Trimethylene                             | 55 |
|     |        |      |         |       |        | 1,2,3,4-Tetrahyd                             | 49 |
|     |        |      |         |       |        | 2,3,4-Trimethoxy                             | 44 |
| 212 | 26.594 | 6782 | 474012  | 11975 | 56898  | Indole, 1-(dichloro)                         | 41 |
|     |        |      |         |       |        | Indane-4-carbon                              | 38 |
|     |        |      |         |       |        | 10H-Phenothiazin                             | 30 |
| 213 | 26.766 | 6826 | 1167967 | 24313 | 69598  | 2-(p-Chlorophenyl)                           | 44 |
|     |        |      |         |       |        | (4R,S)-4-(2-Butyl)                           | 43 |
|     |        |      |         |       |        | 5,6-Diamino-1,3-                             | 38 |
| 214 | 26.833 | 6843 | 384014  | 16598 | 62029  | 1,2,3,4-Tetrahyd                             | 20 |
|     |        |      |         |       |        | 1-(7-Methyl-6H-imidazo                       | 14 |
|     |        |      |         |       |        | As-hydrindacene                              | 11 |
| 215 | 26.915 | 6864 | 4921586 | 57790 | 103386 | Tetradecanoic acid                           | 97 |
|     |        |      |         |       |        | Tetradecanoic acid                           | 94 |
|     |        |      |         |       |        | Tetradecanoic acid                           | 60 |
| 216 | 27.071 | 6904 | 3188647 | 50129 | 96060  | Cyclotridecane                               | 95 |
|     |        |      |         |       |        | Trifluoroacetic acid                         | 93 |
|     |        |      |         |       |        | Trifluoroacetic acid                         | 93 |
| 217 | 27.266 | 6954 | 628740  | 14402 | 60740  | 2,2,5,5-Tetramethyl                          | 15 |
|     |        |      |         |       |        | Propanedioic acid                            | 10 |
|     |        |      |         |       |        | Propanedioic acid                            | 10 |
| 218 | 27.419 | 6993 | 516510  | 11421 | 58081  | Cyclohexane, 1-(piperidin-2-yl)              | 35 |
|     |        |      |         |       |        | Benzenemethanone                             | 15 |
|     |        |      |         |       |        | 2-Amino-6-chloro-3-methyl                    | 15 |
| 219 | 27.493 | 7012 | 1064091 | 15395 | 62213  | 4H-Thiopyran-4-oxide                         | 30 |
|     |        |      |         |       |        | 7-Nonenamide                                 | 25 |
|     |        |      |         |       |        | Benzenemethanone                             | 25 |
| 220 | 27.689 | 7062 | 219042  | 9838  | 57062  | 2H-Benzocyclohexanone                        | 25 |
|     |        |      |         |       |        | 2-Hydroxy-5-methyl                           | 15 |
|     |        |      |         |       |        | 1,4-Benzenediamine                           | 15 |
| 221 | 27.747 | 7077 | 572192  | 10178 | 57526  | 2,4(3H,5H)-Furandione                        | 15 |
|     |        |      |         |       |        | 3,5-Dichlorobenzene                          | 14 |
|     |        |      |         |       |        | Benzoic acid, 3,4-dichloro-                  | 14 |
| 222 | 27.935 | 7125 | 2366534 | 39761 | 87505  | Pentadecanoic acid                           | 93 |
|     |        |      |         |       |        | Pentadecanoic acid                           | 55 |
|     |        |      |         |       |        | Tetradecanoic acid                           | 38 |
| 223 | 28.091 | 7165 | 2792879 | 29856 | 77924  | Pentadecanoic acid                           | 90 |
|     |        |      |         |       |        | 9,9-Dimethoxybicyclo[3.3.1]nonane            | 53 |
|     |        |      |         |       |        | 3-Methyl-8-oxo-3,8-diazabicyclo[3.3.1]nonane | 35 |
| 224 | 28.392 | 7242 | 1399280 | 22238 | 70944  | p-Menth-8(10)-ene                            | 25 |
|     |        |      |         |       |        | Trichloroacetic acid                         | 25 |
|     |        |      |         |       |        | 2-Amino-1-oxaspiro[3.5]nonane                | 15 |

|     |        |      |          |        |        |                    |    |
|-----|--------|------|----------|--------|--------|--------------------|----|
| 225 | 28.564 | 7286 | 1750763  | 30198  | 79263  | 1-Naphthalenam     | 35 |
|     |        |      |          |        |        | 1-Naphthalenam     | 35 |
|     |        |      |          |        |        | 1-Naphthalenam     | 35 |
| 226 | 28.674 | 7314 | 4315552  | 67724  | 117021 | Cyclotetradecane   | 99 |
|     |        |      |          |        |        | Cyclohexadecane    | 98 |
|     |        |      |          |        |        | Cyclotetradecane   | 98 |
| 227 | 28.806 | 7348 | 845220   | 16030  | 65605  | Cyclododecane, i   | 56 |
|     |        |      |          |        |        | Carbonic acid, te  | 53 |
|     |        |      |          |        |        | Ethanol, 2-(tetra  | 35 |
| 228 | 28.986 | 7394 | 691499   | 14414  | 64369  | 1-Propene-1,2,3-   | 20 |
|     |        |      |          |        |        | 4H-1-Benzoselen    | 18 |
|     |        |      |          |        |        | Cyclohexanecarb    | 15 |
| 229 | 29.072 | 7416 | 708589   | 14372  | 64501  | 10-Methylundec     | 56 |
|     |        |      |          |        |        | Cyclododecane, i   | 53 |
|     |        |      |          |        |        | 2-(3-Hydroxy-prc   | 41 |
| 230 | 29.221 | 7454 | 319790   | 7440   | 57887  | 8-endo-Methyl-7    | 25 |
|     |        |      |          |        |        | 6-Ethoxy-9-thia-t  | 18 |
|     |        |      |          |        |        | cis-1,1,2,6-Tetrar | 18 |
| 231 | 29.318 | 7479 | 278629   | 10707  | 61356  | Dodecanoic acid,   | 49 |
|     |        |      |          |        |        | Methyl-2-O-metl    | 35 |
|     |        |      |          |        |        | Undecanoic acid,   | 30 |
| 232 | 29.408 | 7502 | 187549   | 8089   | 58946  | Silanediamine, 1-  | 22 |
|     |        |      |          |        |        | Pyrimidine-4,6-d   | 18 |
|     |        |      |          |        |        | Pyridine, 3-brom   | 18 |
| 233 | 29.475 | 7519 | 267375   | 8011   | 59052  | Ethanone, 1-(2,3   | 38 |
|     |        |      |          |        |        | Oct-3-ene-1,5-di   | 11 |
|     |        |      |          |        |        | o-Acetotoluidide   | 10 |
| 234 | 29.569 | 7543 | 129015   | 4420   | 55730  | Chloro-(3-cycloh   | 35 |
|     |        |      |          |        |        | Benzoic acid, 4-c  | 30 |
|     |        |      |          |        |        | 1,2,3,4-Tetrahyd   | 30 |
| 235 | 29.729 | 7584 | 2045509  | 72125  | 123881 | Palmitoleic acid   | 99 |
|     |        |      |          |        |        | cis-9-Hexadeceni   | 96 |
|     |        |      |          |        |        | Hexadecenoic ac    | 96 |
| 236 | 29.78  | 7597 | 6335323  | 92542  | 144440 | Palmitoleic acid   | 99 |
|     |        |      |          |        |        | cis-9-Hexadeceni   | 97 |
|     |        |      |          |        |        | Hexadecenoic ac    | 97 |
| 237 | 30.002 | 7654 | 54498908 | 570762 | 623281 | n-Hexadecanoic     | 99 |
|     |        |      |          |        |        | n-Hexadecanoic     | 99 |
|     |        |      |          |        |        | n-Hexadecanoic     | 98 |
| 238 | 30.374 | 7749 | 2367406  | 51263  | 104820 | Estra-1,3,5(10)-tr | 50 |
|     |        |      |          |        |        | Dodecanoic acid    | 45 |
|     |        |      |          |        |        | Tetradecanethio    | 42 |
| 239 | 30.471 | 7774 | 586622   | 33301  | 87122  | n-Hexadecanoic     | 55 |
|     |        |      |          |        |        | Tridecanoic acid   | 50 |
|     |        |      |          |        |        | Dodecanoic acid    | 42 |
| 240 | 30.557 | 7796 | 7499623  | 68465  | 122526 | Tetradecanamid     | 76 |
|     |        |      |          |        |        | Tetradecanamid     | 74 |



|     |        |      |          |        |                         |    |
|-----|--------|------|----------|--------|-------------------------|----|
|     |        |      |          |        | Decanamide-             | 62 |
| 241 | 30.905 | 7885 | 1618306  | 26881  | 81920 Cyclotetradecane  | 55 |
|     |        |      |          |        | Cyclododecane           | 49 |
|     |        |      |          |        | 2-Methyl-Z-4-tet        | 46 |
| 242 | 31.022 | 7915 | 2671305  | 33269  | 88636 7-Tridecanone, o  | 43 |
|     |        |      |          |        | N-Methyldodeca          | 43 |
|     |        |      |          |        | Hexanal, O-meth         | 38 |
| 243 | 31.194 | 7959 | 1042210  | 15249  | 71097 Iodotrimethylsila | 22 |
|     |        |      |          |        | Cyclopropane, 1-        | 18 |
|     |        |      |          |        | 5-Acetylimino-7-        | 18 |
| 244 | 31.292 | 7984 | 402106   | 15066  | 71184 Bicyclo[3.1.0]hex | 20 |
|     |        |      |          |        | Nicotinic acid, 1,      | 11 |
|     |        |      |          |        | Cyclohexanami           | 11 |
| 245 | 31.476 | 8031 | 3869210  | 50095  | 106727 Tetradecanamid   | 70 |
|     |        |      |          |        | Tetradecanamid          | 58 |
|     |        |      |          |        | Pentadecanamid          | 53 |
| 246 | 31.609 | 8065 | 4212378  | 55427  | 112431 N,N-Dimethyldoc  | 45 |
|     |        |      |          |        | 2,2'-Bi-1,4-dioxal      | 42 |
|     |        |      |          |        | 3-[3-[2-Methyl-1-       | 41 |
| 247 | 31.839 | 8124 | 2435026  | 38553  | 96198 Cyclohexadecane   | 98 |
|     |        |      |          |        | Cyclopentadecar         | 98 |
|     |        |      |          |        | Cyclotetradecane        | 98 |
| 248 | 31.937 | 8149 | 1908111  | 32291  | 90210 7-Tridecanone, o  | 46 |
|     |        |      |          |        | Cyclotridecanone        | 38 |
|     |        |      |          |        | N-Methyldodeca          | 35 |
| 249 | 32.117 | 8195 | 1617897  | 29799  | 88212 cis-9,10-Epoxyoc  | 43 |
|     |        |      |          |        | Allyldimethylsila       | 30 |
|     |        |      |          |        | 2-Methyl-5-(2,6,1       | 30 |
| 250 | 32.187 | 8213 | 1224355  | 22580  | 81191 Z-11-Pentadecen   | 46 |
|     |        |      |          |        | 2H-Quinolizine-1        | 44 |
|     |        |      |          |        | Z-7-Tetradeceno         | 38 |
| 251 | 32.379 | 8262 | 931945   | 19100  | 78253 5-(2-Methylbuta   | 70 |
|     |        |      |          |        | Bicyclo[3.1.0]hex       | 41 |
|     |        |      |          |        | Phenol, 4-nitro-2       | 38 |
| 252 | 32.488 | 8290 | 1124710  | 20042  | 79494 Dodecanoic acid,  | 46 |
|     |        |      |          |        | N,N-Dimethyldec         | 46 |
|     |        |      |          |        | Octanamide, N,N         | 43 |
| 253 | 32.695 | 8343 | 5080045  | 128178 | 188206 Octadec-9-enoic  | 99 |
|     |        |      |          |        | 9-Octadecenoic a        | 99 |
|     |        |      |          |        | Oleic Acid              | 93 |
| 254 | 32.781 | 8365 | 21624802 | 218305 | 278576 9-Octadecenoic a | 99 |
|     |        |      |          |        | Oleic Acid              | 99 |
|     |        |      |          |        | 9-Octadecenoic a        | 99 |
| 255 | 33.051 | 8434 | 17571775 | 179922 | 240952 Octadecanoic aci | 99 |
|     |        |      |          |        | Octadecanoic aci        | 96 |
|     |        |      |          |        | Octadecanoic aci        | 95 |
| 256 | 33.262 | 8488 | 4145072  | 109321 | 170937 Oleic Acid       | 56 |

|     |        |      |          |        |        |                                 |    |
|-----|--------|------|----------|--------|--------|---------------------------------|----|
|     |        |      |          |        |        | Oleic Acid                      | 52 |
|     |        |      |          |        |        | 9-Octadecenami                  | 38 |
| 257 | 33.317 | 8502 | 5510354  | 86368  | 148137 | E-11-Hexadecena                 | 90 |
|     |        |      |          |        |        | 9-Hexadecenoic                  | 68 |
|     |        |      |          |        |        | Z-8-Methyl-9-tet                | 62 |
| 258 | 33.496 | 8548 | 20696175 | 263442 | 325709 | Hexadecanamide                  | 94 |
|     |        |      |          |        |        | Hexadecanamide                  | 91 |
|     |        |      |          |        |        | Octadecanamide                  | 87 |
| 259 | 33.649 | 8587 | 7986044  | 116626 | 179325 | Hexadecanamide                  | 81 |
|     |        |      |          |        |        | Octadecanamide                  | 81 |
|     |        |      |          |        |        | 9-Octadecenami                  | 74 |
| 260 | 33.911 | 8654 | 11700414 | 194227 | 257653 | Dodecanal, O-me                 | 52 |
|     |        |      |          |        |        | Decanal, O-meth                 | 47 |
|     |        |      |          |        |        | 2-Hexanone oxin                 | 38 |
| 261 | 34.18  | 8723 | 1477278  | 36516  | 100695 | Methyl 4-hydrox                 | 47 |
|     |        |      |          |        |        | 2-Methyl-Z-4-tet                | 40 |
|     |        |      |          |        |        | 8-Chloro-3,6-dio                | 35 |
| 262 | 34.274 | 8747 | 1841050  | 30718  | 95154  | 14-Methylpenta                  | 44 |
|     |        |      |          |        |        | E-8-Methyl-9-tet                | 43 |
|     |        |      |          |        |        | Acetic acid, 3-me               | 35 |
| 263 | 34.395 | 8778 | 1903581  | 44423  | 109201 | Octanamide, N,N                 | 76 |
|     |        |      |          |        |        | 3-Cyclopentylprc                | 64 |
|     |        |      |          |        |        | Isooctanamide, N                | 52 |
| 264 | 34.493 | 8803 | 7405957  | 96979  | 162034 | 3-Cyclopentylprc                | 72 |
|     |        |      |          |        |        | Undecanone, 2-r                 | 72 |
|     |        |      |          |        |        | 2-Heptenoic acid                | 53 |
| 265 | 34.724 | 8862 | 1141128  | 25313  | 91006  | Pentafluoroprop                 | 87 |
|     |        |      |          |        |        | Heptadecyl hept                 | 70 |
|     |        |      |          |        |        | Cyclododecane                   | 70 |
| 266 | 34.79  | 8879 | 1532796  | 17714  | 83593  | 1-Phenyl-3,5,7-tr               | 86 |
|     |        |      |          |        |        | Phosphetane, 1-l                | 56 |
|     |        |      |          |        |        | 2-Nonenal, 2-per                | 48 |
| 267 | 34.954 | 8921 | 376908   | 16309  | 82644  | Phosphetane, 1-l                | 78 |
|     |        |      |          |        |        | Z-(13,14-Epoxy)t                | 78 |
|     |        |      |          |        |        | E-11-Methyl-12-l                | 72 |
| 268 | 35.079 | 8953 | 1620872  | 35642  | 102327 | Guanidine, N-[3-                | 93 |
|     |        |      |          |        |        | 2-Methyl-5-(2,6,l               | 47 |
|     |        |      |          |        |        | 9-Octadecenami                  | 43 |
| 269 | 35.118 | 8963 | 2068180  | 30504  | 97303  | 6-Octadecenoic a                | 55 |
|     |        |      |          |        |        | Pyrrole-2,3,4-tric              | 53 |
|     |        |      |          |        |        | trans-2-Hexadec                 | 44 |
| 270 | 35.298 | 9009 | 565579   | 13591  | 80889  | Phosphetane, 1-l                | 59 |
|     |        |      |          |        |        | 2H-Pyran-2-one,                 | 46 |
|     |        |      |          |        |        | 7-Hydroxy-3-(1,1                | 45 |
| 271 | 35.369 | 9027 | 611408   | 15205  | 82702  | 1H-Indene, 5-but                | 25 |
|     |        |      |          |        |        | Butyric acid, [N <sup>1</sup> - | 15 |
|     |        |      |          |        |        | Cyclohexanooxa                  | 14 |

|     |        |      |          |        |        |                                                           |                |
|-----|--------|------|----------|--------|--------|-----------------------------------------------------------|----------------|
| 272 | 35.431 | 9043 | 220597   | 14526  | 82193  | 4-Hydroxy-3-pen<br>E-8-Methyl-9-tet<br>4-n-Hexylthiane,   | 48<br>46<br>42 |
| 273 | 35.458 | 9050 | 613535   | 16239  | 83983  | 9-Octadecenoic a<br>9-Octadecenoic a<br>Octadec-9-enoic   | 55<br>55<br>45 |
| 274 | 35.564 | 9077 | 841359   | 13157  | 81193  | 4-Acetyl-3-aminc<br>4,7,7-Trimethylb<br>Pyrazolo[5,1-c][1 | 11<br>11<br>11 |
| 275 | 35.677 | 9106 | 249803   | 10238  | 78593  | E-8-Methyl-9-tet<br>Z-7-Pentadecenc<br>2,5-Furandione, 1  | 81<br>58<br>56 |
| 276 | 35.791 | 9135 | 1389586  | 30553  | 99222  | Ethyl 4,8,12-trim<br>5-Methoxy-4,4,7<br>Butane, 1,1'-[me  | 64<br>45<br>43 |
| 277 | 35.939 | 9173 | 1027936  | 18724  | 87814  | 2-Hexadecenoic .<br>2-Hexyldecanoic<br>Pyrrole-2,3,4-tric | 45<br>25<br>25 |
| 278 | 36.021 | 9194 | 4892738  | 141694 | 211007 | 9-Octadecenami<br>9-Octadecenami<br>9-Octadecenami        | 99<br>99<br>99 |
| 279 | 36.111 | 9217 | 11735220 | 162357 | 231925 | 9-Octadecenami<br>9-Octadecenami<br>9-Octadecenami        | 98<br>95<br>94 |
| 280 | 36.365 | 9282 | 15577879 | 282044 | 352317 | Octadecanamide<br>9-Octadecenami<br>Octadecanamide        | 49<br>41<br>41 |
| 281 | 36.471 | 9309 | 8663130  | 146277 | 216847 | Dodecanamide<br>9-Octadecenami<br>9-Octadecenami          | 55<br>46<br>43 |
| 282 | 36.721 | 9373 | 4919322  | 97578  | 168851 | N-Methyldodeca<br>Decanal, O-meth<br>Hexanal, O-meth      | 64<br>50<br>50 |
| 283 | 36.865 | 9410 | 2305068  | 57063  | 128734 | 9-Octadecenami<br>Non-7-enoic acid<br>N,N-Dimethyldec     | 90<br>47<br>43 |
| 284 | 36.971 | 9437 | 4555104  | 61446  | 133416 | 9-Octadecenami<br>Non-7-enoic acid<br>N,N-Dimethylhe      | 94<br>64<br>58 |
| 285 | 37.159 | 9485 | 889330   | 23563  | 96059  | Cyclopentanecar<br>3-Cyclopentylprc<br>1,5,5-Trimethyl-6  | 46<br>43<br>42 |
| 286 | 37.237 | 9505 | 3825039  | 68045  | 140750 | 3-Cyclopentylprc<br>N,N-Dimethyldec<br>Undecanone, 2-r    | 72<br>72<br>64 |
| 287 | 37.467 | 9564 | 664757   | 19167  | 92517  | 1H-Indole, 5-met<br>Benzene, 1,3,5-tri                    | 41<br>38       |

|     |        |       |         |       |        |                    |    |
|-----|--------|-------|---------|-------|--------|--------------------|----|
|     |        |       |         |       |        | 2-Hydroxychalco    | 38 |
| 288 | 37.51  | 9575  | 1532676 | 20995 | 94469  | Morpholine, 4-(4   | 59 |
|     |        |       |         |       |        | 2-Methyl-Z-4-tet   | 43 |
|     |        |       |         |       |        | E-8-Methyl-9-tet   | 41 |
| 289 | 37.721 | 9629  | 2596891 | 78560 | 152624 | Goitrin            | 49 |
|     |        |       |         |       |        | Cyclohexanecarb    | 38 |
|     |        |       |         |       |        | Adipic acid, decy  | 35 |
| 290 | 37.764 | 9640  | 3563844 | 71216 | 145395 | N-Decanoylmorp     | 47 |
|     |        |       |         |       |        | Goitrin            | 43 |
|     |        |       |         |       |        | 4-Nitro-1H-pyraz   | 38 |
| 291 | 38.061 | 9716  | 271968  | 7994  | 83001  | Ethanone, 1-(2,3   | 30 |
|     |        |       |         |       |        | Ethanone, 1-(2,3   | 30 |
|     |        |       |         |       |        | 5H-Benzo[b]pyra    | 25 |
| 292 | 38.136 | 9735  | 384642  | 9711  | 84930  | i-Propyl 9-tetrad  | 44 |
|     |        |       |         |       |        | E-8-Methyl-9-tet   | 43 |
|     |        |       |         |       |        | 1,3,2-Dioxaphos    | 38 |
| 293 | 38.226 | 9758  | 788177  | 14975 | 90448  | 7,9-Dimethyl-1,4   | 43 |
|     |        |       |         |       |        | Cyclododecanec     | 35 |
|     |        |       |         |       |        | 1,3,2-Dioxaphos    | 25 |
| 294 | 38.335 | 9786  | 207006  | 8293  | 84073  | i-Propyl 9-tetrad  | 53 |
|     |        |       |         |       |        | 2-Methyl-E-7-oct   | 50 |
|     |        |       |         |       |        | 2-Methyl-Z-4-tet   | 43 |
| 295 | 38.444 | 9814  | 614986  | 16383 | 92459  | 3-Dimethylaminc    | 35 |
|     |        |       |         |       |        | 1,2-Bis(dichlorop  | 30 |
|     |        |       |         |       |        | Succinic acid, 4-f | 30 |
| 296 | 38.659 | 9869  | 1284545 | 24739 | 101424 | 5-[p-Chlorocinna   | 47 |
|     |        |       |         |       |        | 9-Octadecenami     | 30 |
|     |        |       |         |       |        | Ethanone, 1-(2,3   | 25 |
| 297 | 38.761 | 9895  | 953331  | 31457 | 108420 | 9-Octadecenami     | 64 |
|     |        |       |         |       |        | 4H-Cyclopenta[b    | 30 |
|     |        |       |         |       |        | 4-Thiouridine dis  | 25 |
| 298 | 38.82  | 9910  | 2862036 | 67626 | 144747 | 10-Methyl-dodec    | 97 |
|     |        |       |         |       |        | 14-Methyl-hepta    | 96 |
|     |        |       |         |       |        | Tetradecanoic ac   | 96 |
| 299 | 38.988 | 9953  | 1780468 | 50344 | 127938 | Glutaric acid, 4-c | 50 |
|     |        |       |         |       |        | Glutaric acid, he  | 46 |
|     |        |       |         |       |        | Glutaric acid, per | 46 |
| 300 | 39.128 | 9989  | 687584  | 13100 | 91093  | 1,3,2-Dioxaphos    | 30 |
|     |        |       |         |       |        | 1,4-Benzenediol,   | 25 |
|     |        |       |         |       |        | Dodecahydropyr     | 25 |
| 301 | 39.289 | 10030 | 1496306 | 26648 | 105088 | 2-(2-Benzothiaz    | 47 |
|     |        |       |         |       |        | Benz[c]acridine,   | 46 |
|     |        |       |         |       |        | 3-Carboxy-10-me    | 38 |
| 302 | 39.449 | 10071 | 1106335 | 13802 | 92681  | 2-Butenenitrile, : | 42 |
|     |        |       |         |       |        | Benzene, 2-[(tert  | 42 |
|     |        |       |         |       |        | Acetic acid, [4-(1 | 38 |
| 303 | 39.621 | 10115 | 260893  | 8685  | 88052  | 2-Myristynoyl-gl   | 59 |

|     |        |       |         |        |        |                    |    |
|-----|--------|-------|---------|--------|--------|--------------------|----|
|     |        |       |         |        |        | 3-Quinolinecarb    | 43 |
|     |        |       |         |        |        | Benzo[h]quinolir   | 42 |
| 304 | 39.683 | 10131 | 290715  | 7816   | 87357  | 2-Bromo-4,5-dir    | 50 |
|     |        |       |         |        |        | 2-(Acetoxymethy    | 45 |
|     |        |       |         |        |        | Benzo[h]quinolir   | 42 |
| 305 | 39.75  | 10148 | 143556  | 5954   | 85679  | 2-Myristynoyl-gl   | 50 |
|     |        |       |         |        |        | 3-Quinolinecarb    | 45 |
|     |        |       |         |        |        | 2-(Acetoxymethy    | 45 |
| 306 | 39.848 | 10173 | 330769  | 8814   | 88806  | 2-(Acetoxymethy    | 43 |
|     |        |       |         |        |        | Phenol, 6-methy    | 42 |
|     |        |       |         |        |        | Benzene, 2-[(tert  | 42 |
| 307 | 39.953 | 10200 | 1383113 | 30316  | 110607 | Cyclobutanecarb    | 42 |
|     |        |       |         |        |        | Benzene, 2-[(tert  | 40 |
|     |        |       |         |        |        | Acetic acid, [4-(1 | 25 |
| 308 | 40.055 | 10226 | 2744326 | 38401  | 118978 | Cyclobutanecarb    | 25 |
|     |        |       |         |        |        | Acetic acid, [4-(1 | 25 |
|     |        |       |         |        |        | Phenol, 6-methy    | 25 |
| 309 | 40.266 | 10280 | 2782050 | 47127  | 128294 | 2,2-Dimethyl-1-o   | 42 |
|     |        |       |         |        |        | Goitrin            | 38 |
|     |        |       |         |        |        | 4-t-Butylcyclohe   | 38 |
| 310 | 40.446 | 10326 | 157116  | 4847   | 86532  | 1,2-Benzenediol,   | 45 |
|     |        |       |         |        |        | 2-Ethylacridine    | 42 |
|     |        |       |         |        |        | 7a,9c-(Iminoetha   | 42 |
| 311 | 40.59  | 10363 | 348802  | 10463  | 92783  | 2-(Acetoxymethy    | 50 |
|     |        |       |         |        |        | Ethanone, 2-(2-b   | 38 |
|     |        |       |         |        |        | Propiophenone,     | 38 |
| 312 | 40.641 | 10376 | 258899  | 6326   | 88869  | Adamantane-1-(:    | 55 |
|     |        |       |         |        |        | 2-(Acetoxymethy    | 45 |
|     |        |       |         |        |        | Dodecahydropyr     | 42 |
| 313 | 40.758 | 10406 | 449525  | 8810   | 91853  | Adamantane-1-(:    | 56 |
|     |        |       |         |        |        | 2-Ethylacridine    | 55 |
|     |        |       |         |        |        | 1H-Indole, 1-met   | 42 |
| 314 | 40.852 | 10430 | 230721  | 5094   | 88554  | 2-(Acetoxymethy    | 45 |
|     |        |       |         |        |        | 1,4-Bis(trimethyl  | 41 |
|     |        |       |         |        |        | 1,2-Bis(trimethyl  | 41 |
| 315 | 41.024 | 10474 | 556514  | 18374  | 102576 | Pyrrolidine, 1-(1- | 83 |
|     |        |       |         |        |        | Pyrrolidine, 1-(1- | 81 |
|     |        |       |         |        |        | Pyrrolidine, 1-(1- | 80 |
| 316 | 41.114 | 10497 | 869977  | 22350  | 106949 | Pyrrolidine, 1-(1- | 86 |
|     |        |       |         |        |        | 9-Tetradecenoic    | 83 |
|     |        |       |         |        |        | Pyrrolidine, 1-(1- | 80 |
| 317 | 41.184 | 10515 | 572734  | 17222  | 102126 | 8-Morpholino-4-    | 70 |
|     |        |       |         |        |        | tert-Butyl(5-isop  | 43 |
|     |        |       |         |        |        | 2-Ethylacridine    | 38 |
| 318 | 41.278 | 10539 | 4074050 | 110393 | 195700 | Pyrene, 2-methy    | 27 |
|     |        |       |         |        |        | Methyl 5,11,14,1   | 22 |
|     |        |       |         |        |        | 7H-Benzo[c]fluor   | 22 |

|     |        |       |         |       |        |                                         |          |
|-----|--------|-------|---------|-------|--------|-----------------------------------------|----------|
| 319 | 41.427 | 10577 | 233029  | 8529  | 94477  | 1,4-Bis(trimethyl<br>2-Myristynoyl-gl   | 43<br>43 |
|     |        |       |         |       |        | 1,2-Bis(trimethyl                       | 43       |
| 320 | 41.524 | 10602 | 1194061 | 29646 | 116019 | Benzo[h]quinolir<br>2-Myristynoyl-gl    | 52<br>50 |
|     |        |       |         |       |        | N-Methyl-1-adar                         | 38       |
| 321 | 41.602 | 10622 | 2921332 | 73239 | 159961 | 4-Nitrobenzylide<br>1,4-Methanoazu      | 90<br>45 |
|     |        |       |         |       |        | Pregnan-18-oic a                        | 45       |
| 322 | 41.86  | 10688 | 3177078 | 98574 | 186412 | 1,3-Diphenyl-1,2<br>4H-4a,7-Methan      | 25<br>25 |
|     |        |       |         |       |        | (-)-(2S,8Ar)-(cam                       | 25       |
| 323 | 42.025 | 10730 | 2437015 | 78546 | 167103 | Carbonic acid, m<br>2-Ethylacridine     | 25<br>25 |
|     |        |       |         |       |        | Cyclopenteno[4.                         | 22       |
| 324 | 42.114 | 10753 | 350879  | 12290 | 101240 | Silane, trimethyl <br>2-Ethylacridine   | 60<br>50 |
|     |        |       |         |       |        | Benzo[h]quinolir                        | 50       |
| 325 | 42.247 | 10787 | 406223  | 8072  | 97595  | 2-Ethylacridine<br>tert-Butyl(5-isop    | 62<br>46 |
|     |        |       |         |       |        | Propiophenone,                          | 46       |
| 326 | 42.333 | 10809 | 164348  | 5550  | 95473  | 2,4-Cyclohexadie<br>Silane, trimethyl   | 87<br>78 |
|     |        |       |         |       |        | 1,2-Bis(trimethyl                       | 60       |
| 327 | 42.411 | 10829 | 126399  | 5532  | 95917  | Silane, trimethyl <br>Benzo[h]quinolir  | 55<br>50 |
|     |        |       |         |       |        | 2-Ethylacridine                         | 46       |
| 328 | 42.525 | 10858 | 629443  | 19314 | 110402 | Silicic acid, dieth<br>Benzo[h]quinolir | 52<br>50 |
|     |        |       |         |       |        | 1,2-Bis(trimethyl                       | 49       |
| 329 | 42.619 | 10882 | 915776  | 22873 | 114512 | Ethane, 1-(4,4,4-<br>1,4-Bis(trimethyl  | 43<br>43 |
|     |        |       |         |       |        | Silane, trimethyl                       | 43       |
| 330 | 42.728 | 10910 | 155808  | 6135  | 98454  | Propiophenone,<br>Silane, trimethyl     | 53<br>49 |
|     |        |       |         |       |        | Benzo[h]quinolir                        | 46       |
| 331 | 42.802 | 10929 | 358221  | 7263  | 100027 | Silane, trimethyl <br>2-Ethylacridine   | 78<br>50 |
|     |        |       |         |       |        | 5-Methyl-2-trime                        | 49       |
| 332 | 42.904 | 10955 | 609279  | 9763  | 103133 | Silane, trimethyl <br>1,2-Benzisothiaz  | 55<br>49 |
|     |        |       |         |       |        | Trimethyl[4-(1,1,                       | 46       |
| 333 | 43.095 | 11004 | 1709510 | 34387 | 128915 | Pyrazolo[1,5-c]p<br>3-Phenylpropion     | 35<br>35 |
|     |        |       |         |       |        | 1,4-Bis(trimethyl                       | 30       |
| 334 | 43.224 | 11037 | 608120  | 13860 | 109158 | Silane, trimethyl <br>5-Methyl-2-trime  | 55<br>46 |

|     |        |       |         |       |        |                   |    |
|-----|--------|-------|---------|-------|--------|-------------------|----|
|     |        |       |         |       |        | 1,2-Benzisothiaz  | 46 |
| 335 | 43.369 | 11074 | 277531  | 7654  | 103828 | Silane, trimethyl | 53 |
|     |        |       |         |       |        | 5-Methyl-2-trime  | 47 |
|     |        |       |         |       |        | 1,2-Benzisothiaz  | 46 |
| 336 | 43.494 | 11106 | 1085319 | 32322 | 129242 | 4-Dehydroxy-N-(   | 52 |
|     |        |       |         |       |        | 1,2-Benzisothiaz  | 46 |
|     |        |       |         |       |        | Benzo[h]quinolir  | 41 |
| 337 | 43.611 | 11136 | 189943  | 8460  | 106096 | Trimethyl[4-(1,1, | 60 |
|     |        |       |         |       |        | Benzo[h]quinolir  | 43 |
|     |        |       |         |       |        | Trimethyl(4-tert- | 43 |
| 338 | 43.721 | 11164 | 467369  | 11104 | 109408 | Silane, trimethyl | 49 |
|     |        |       |         |       |        | 1,4-Bis(trimethyl | 47 |
|     |        |       |         |       |        | Methyltris(trime  | 47 |
| 339 | 43.807 | 11186 | 1180704 | 27870 | 126696 | Silane, trimethyl | 55 |
|     |        |       |         |       |        | Benzo[h]quinolir  | 46 |
|     |        |       |         |       |        | Trimethyl[4-(1,1, | 46 |
| 340 | 44.057 | 11250 | 1528307 | 37665 | 139244 | Silane, trimethyl | 55 |
|     |        |       |         |       |        | Methyltris(trime  | 43 |
|     |        |       |         |       |        | Acetamide, N-[4-  | 43 |
| 341 | 44.217 | 11291 | 1181346 | 31598 | 135847 | Silane, trimethyl | 55 |
|     |        |       |         |       |        | 2-Ethylacridine   | 46 |
|     |        |       |         |       |        | Trimethyl[4-(1,1, | 46 |
| 342 | 44.323 | 11318 | 252079  | 8677  | 114735 | Benzo[h]quinolir  | 49 |
|     |        |       |         |       |        | Anthracene, 9,10  | 46 |
|     |        |       |         |       |        | 1,2-Bis(trimethyl | 46 |
| 343 | 44.409 | 11340 | 145425  | 4659  | 112125 | Benzo[h]quinolir  | 49 |
|     |        |       |         |       |        | 5-Methyl-2-phen   | 46 |
|     |        |       |         |       |        | Trimethyl[4-(1,1, | 46 |
| 344 | 44.612 | 11392 | 420272  | 9281  | 120482 | Cyclotrisiloxane, | 46 |
|     |        |       |         |       |        | Methyltris(trime  | 43 |
|     |        |       |         |       |        | Cyclotrisiloxane, | 43 |
| 345 | 44.71  | 11417 | 156920  | 6197  | 119281 | Benzo[h]quinolir  | 43 |
|     |        |       |         |       |        | 5-Methyl-2-phen   | 43 |
|     |        |       |         |       |        | 5-Methyl-2-trime  | 43 |
| 346 | 44.784 | 11436 | 211286  | 6734  | 121804 | Tris(tert-butyldi | 46 |
|     |        |       |         |       |        | 4-Methyl-2-trime  | 46 |
|     |        |       |         |       |        | Trimethyl[4-(1-m  | 43 |
| 347 | 45.104 | 11518 | 4358748 | 44335 | 157990 | Silane, trimethyl | 49 |
|     |        |       |         |       |        | Benzo[h]quinolir  | 49 |
|     |        |       |         |       |        | 1,4-Bis(trimethyl | 46 |
| 348 | 45.323 | 11574 | 1143420 | 21291 | 137105 | Tris(tert-butyldi | 45 |
|     |        |       |         |       |        | 4-Methyl-2-trime  | 38 |
|     |        |       |         |       |        | 2,4,6-Cyclohepta  | 38 |
| 349 | 45.425 | 11600 | 407014  | 10382 | 127195 | 2-(Acetoxymethy   | 53 |
|     |        |       |         |       |        | Tris(tert-butyldi | 47 |
|     |        |       |         |       |        | Tetrasiloxane, de | 47 |
| 350 | 45.581 | 11640 | 712156  | 9600  | 127978 | Cyclotrisiloxane, | 46 |

|     |        |       |         |       |        |                     |    |
|-----|--------|-------|---------|-------|--------|---------------------|----|
|     |        |       |         |       |        | 5-Methyl-2-phen     | 46 |
|     |        |       |         |       |        | Tris(tert-butylidin | 46 |
| 351 | 45.773 | 11689 | 1187116 | 13719 | 133979 | Cyclotrisiloxane,   | 46 |
|     |        |       |         |       |        | Tris(tert-butylidin | 46 |
|     |        |       |         |       |        | Methyltris(trimethy | 43 |
| 352 | 45.882 | 11717 | 889970  | 11573 | 132924 | Tris(tert-butylidin | 46 |
|     |        |       |         |       |        | Benzo[h]quinolir    | 46 |
|     |        |       |         |       |        | Cyclotrisiloxane,   | 46 |
| 353 | 46.152 | 11786 | 1063149 | 12152 | 136147 | Tris(tert-butylidin | 49 |
|     |        |       |         |       |        | Cyclotrisiloxane,   | 46 |
|     |        |       |         |       |        | 1,2-Benzenediol,    | 43 |
| 354 | 46.246 | 11810 | 430392  | 14113 | 139029 | 5-Methyl-2-phen     | 46 |
|     |        |       |         |       |        | Tris(tert-butylidin | 46 |
|     |        |       |         |       |        | Cyclotrisiloxane,   | 43 |
| 355 | 46.277 | 11818 | 839695  | 14472 | 139732 | 2-(Acetoxymethy     | 53 |
|     |        |       |         |       |        | Tris(tert-butylidin | 49 |
|     |        |       |         |       |        | Cyclotrisiloxane,   | 46 |
| 356 | 46.394 | 11848 | 504767  | 16742 | 143129 | Tris(tert-butylidin | 46 |
|     |        |       |         |       |        | Cyclotrisiloxane,   | 43 |
|     |        |       |         |       |        | 1,2-Benzisothiaz    | 43 |
| 357 | 46.496 | 11874 | 863165  | 16615 | 144013 | Arsenous acid, tr   | 52 |
|     |        |       |         |       |        | Tris(tert-butylidin | 52 |
|     |        |       |         |       |        | Cyclotrisiloxane,   | 50 |
| 358 | 46.613 | 11904 | 3254026 | 32452 | 161012 | Cyclotrisiloxane,   | 46 |
|     |        |       |         |       |        | 1,2-Benzenediol,    | 43 |
|     |        |       |         |       |        | 4-Methyl-2-trime    | 43 |
| 359 | 46.855 | 11966 | 1146877 | 21913 | 152895 | Tris(tert-butylidin | 49 |
|     |        |       |         |       |        | Cyclotrisiloxane,   | 49 |
|     |        |       |         |       |        | Cyclotrisiloxane,   | 43 |
| 360 | 46.89  | 11975 | 604223  | 22587 | 153895 | Cyclotrisiloxane,   | 53 |
|     |        |       |         |       |        | Tris(tert-butylidin | 47 |
|     |        |       |         |       |        | Cyclotrisiloxane,   | 47 |
| 361 | 47.137 | 12038 | 5343795 | 39940 | 173672 | Tris(tert-butylidin | 53 |
|     |        |       |         |       |        | Cyclotrisiloxane,   | 46 |
|     |        |       |         |       |        | 1,4-Bis(trimethyl   | 43 |
| 362 | 47.277 | 12074 | 1108931 | 30868 | 166018 | Cyclotrisiloxane,   | 46 |
|     |        |       |         |       |        | 5-Methyl-2-phen     | 46 |
|     |        |       |         |       |        | Tris(tert-butylidin | 46 |
| 363 | 47.348 | 12092 | 1114621 | 30381 | 166211 | Tris(tert-butylidin | 49 |
|     |        |       |         |       |        | Cyclotrisiloxane,   | 46 |
|     |        |       |         |       |        | Cyclotrisiloxane,   | 43 |
| 364 | 47.43  | 12113 | 1751048 | 31545 | 168193 | Benzo[h]quinolir    | 46 |
|     |        |       |         |       |        | Cyclotrisiloxane,   | 46 |
|     |        |       |         |       |        | Cyclotrisiloxane,   | 43 |
| 365 | 47.504 | 12132 | 1071099 | 30894 | 168260 | Cyclotrisiloxane,   | 58 |
|     |        |       |         |       |        | Arsenous acid, tr   | 50 |
|     |        |       |         |       |        | Cyclotrisiloxane,   | 50 |



|     |        |       |         |       |        |                                                                                                 |                |
|-----|--------|-------|---------|-------|--------|-------------------------------------------------------------------------------------------------|----------------|
| 366 | 47.551 | 12144 | 681403  | 32934 | 170784 | 2-(Acetoxymethyl) Cyclotrisiloxane, Tris(tert-butyl)dimethyl                                    | 47<br>46<br>46 |
| 367 | 47.598 | 12156 | 738203  | 32020 | 170336 | Arsenous acid, tricyclotrisiloxane, Tris(tert-butyl)dimethyl                                    | 46<br>43<br>43 |
| 368 | 47.707 | 12184 | 2334330 | 37215 | 176592 | Cyclotrisiloxane, Tris(tert-butyl)dimethyl                                                      | 46<br>46<br>43 |
| 369 | 47.746 | 12194 | 1096128 | 39722 | 179503 | Tris(tert-butyl)dimethyl Cyclotrisiloxane, Cyclotrisiloxane,                                    | 49<br>46<br>43 |
| 370 | 48.082 | 12280 | 8876474 | 48236 | 191327 | Tris(tert-butyl)dimethyl Cyclotrisiloxane, 1,2-Bis(trimethylsilyloxy)ethane                     | 46<br>46<br>43 |
| 371 | 48.168 | 12302 | 1407224 | 46187 | 190151 | Tris(tert-butyl)dimethyl Cyclotrisiloxane, Arsenous acid, tricyclotrisiloxane,                  | 49<br>46<br>43 |
| 372 | 48.254 | 12324 | 2353739 | 49310 | 194122 | Tris(tert-butyl)dimethyl Arsenous acid, tricyclotrisiloxane, 2,4,6-Cycloheptatriene             | 49<br>46<br>43 |
| 373 | 48.352 | 12349 | 3059067 | 50687 | 196457 | Arsenous acid, tricyclotrisiloxane, Tris(tert-butyl)dimethyl 4-Methyl-2-trimethylsilyloxyethane | 46<br>46<br>43 |
| 374 | 48.411 | 12364 | 1677030 | 52600 | 198963 | Tris(tert-butyl)dimethyl Cyclotrisiloxane, Cyclotrisiloxane,                                    | 49<br>46<br>43 |
| 375 | 48.622 | 12418 | 8881019 | 63080 | 211542 | Cyclotrisiloxane, Tris(tert-butyl)dimethyl Cyclotrisiloxane,                                    | 49<br>49<br>47 |
| 376 | 48.708 | 12440 | 963308  | 60004 | 209301 | Tris(tert-butyl)dimethyl Tetrasiloxane, decyl Cyclotrisiloxane,                                 | 49<br>47<br>46 |
| 377 | 48.95  | 12502 | 9287756 | 67864 | 219541 | Tris(tert-butyl)dimethyl Arsenous acid, tricyclotrisiloxane, Cyclotrisiloxane,                  | 49<br>46<br>46 |
| 378 | 49.017 | 12519 | 5485116 | 72132 | 224471 | Cyclotrisiloxane, Arsenous acid, tricyclotrisiloxane, Tris(tert-butyl)dimethyl                  | 49<br>46<br>46 |
| 379 | 49.122 | 12546 | 2192569 | 68916 | 222319 | Arsenous acid, tricyclotrisiloxane, Cyclotrisiloxane, Cyclotrisiloxane,                         | 49<br>49<br>47 |
| 380 | 49.173 | 12559 | 1349405 | 68624 | 222530 | Cyclotrisiloxane, Arsenous acid, tricyclotrisiloxane, Methyltris(trimethylsilyloxy)ethane       | 49<br>47<br>47 |
| 381 | 49.216 | 12570 | 1778135 | 69469 | 223787 | Arsenous acid, tricyclotrisiloxane, Cyclotrisiloxane,                                           | 49<br>49       |

|     |        |       |         |       |        |                                          |          |
|-----|--------|-------|---------|-------|--------|------------------------------------------|----------|
|     |        |       |         |       |        | Cyclotrisiloxane,                        | 49       |
| 382 | 49.384 | 12613 | 6908992 | 71570 | 227547 | Tris(tert-butylidin<br>Cyclotrisiloxane, | 49<br>47 |
|     |        |       |         |       |        | Arsenous acid, tr                        | 47       |
| 383 | 49.427 | 12624 | 2529289 | 72328 | 228733 | Tris(tert-butylidin<br>Cyclotrisiloxane, | 52<br>52 |
|     |        |       |         |       |        | Arsenous acid, tr                        | 50       |
| 384 | 49.513 | 12646 | 2958813 | 71486 | 228763 | Cyclotrisiloxane,                        | 52       |
|     |        |       |         |       |        | Arsenous acid, tr                        | 52       |
|     |        |       |         |       |        | Cyclotrisiloxane,                        | 50       |
| 385 | 49.552 | 12656 | 1435516 | 70265 | 227899 | Tris(tert-butylidin<br>Cyclotrisiloxane, | 49<br>49 |
|     |        |       |         |       |        | 1,1,1,3,5,5,5-Hept                       | 43       |
| 386 | 49.704 | 12695 | 7033565 | 71329 | 230466 | Cyclotrisiloxane,                        | 46       |
|     |        |       |         |       |        | Benzo[h]quinolir                         | 46       |
|     |        |       |         |       |        | Arsenous acid, tr                        | 46       |
| 387 | 49.763 | 12710 | 2257125 | 70543 | 230263 | Tris(tert-butylidin<br>Cyclotrisiloxane, | 47<br>46 |
|     |        |       |         |       |        | Arsenous acid, tr                        | 46       |
| 388 | 49.794 | 12718 | 1909543 | 72183 | 232216 | Tris(tert-butylidin<br>Cyclotrisiloxane, | 49<br>46 |
|     |        |       |         |       |        | Cyclotrisiloxane,                        | 46       |
| 389 | 49.857 | 12734 | 6526042 | 70889 | 231562 | Cyclotrisiloxane,                        | 49       |
|     |        |       |         |       |        | Arsenous acid, tr                        | 47       |
|     |        |       |         |       |        | Tris(tert-butylidin                      | 46       |
| 390 | 50.013 | 12774 | 6885456 | 68516 | 230723 | Methyltris(trimethy<br>Arsenous acid, tr | 47<br>46 |
|     |        |       |         |       |        | Cyclotrisiloxane,                        | 46       |
| 391 | 50.201 | 12822 | 2045119 | 66740 | 230794 | Tris(tert-butylidin<br>Arsenous acid, tr | 49<br>46 |
|     |        |       |         |       |        | Cyclotrisiloxane,                        | 46       |
| 392 | 50.259 | 12837 | 2407206 | 61660 | 226289 | Arsenous acid, tr                        | 49       |
|     |        |       |         |       |        | Cyclotrisiloxane,                        | 47       |
|     |        |       |         |       |        | 2-(Acetoxymethy                          | 47       |
| 393 | 50.318 | 12852 | 3611611 | 62483 | 227701 | Cyclotrisiloxane,                        | 52       |
|     |        |       |         |       |        | Arsenous acid, tr                        | 49       |
|     |        |       |         |       |        | 1,4-Bis(trimethyl                        | 47       |
| 394 | 50.42  | 12878 | 1318945 | 59257 | 225474 | Arsenous acid, tr                        | 49       |
|     |        |       |         |       |        | Tris(tert-butylidin                      | 49       |
|     |        |       |         |       |        | Cyclotrisiloxane,                        | 49       |
| 395 | 50.443 | 12884 | 3007938 | 59494 | 225938 | Cyclotrisiloxane,                        | 49       |
|     |        |       |         |       |        | Arsenous acid, tr                        | 47       |
|     |        |       |         |       |        | Methyltris(trimethy                      | 47       |
| 396 | 50.537 | 12908 | 2460475 | 61147 | 228533 | Cyclotrisiloxane,                        | 53       |
|     |        |       |         |       |        | Tris(tert-butylidin                      | 53       |
|     |        |       |         |       |        | Cyclotrisiloxane,                        | 50       |
| 397 | 50.646 | 12936 | 3376107 | 60027 | 228509 | Tris(tert-butylidin                      | 49       |

|     |        |       |         |       |        |                     |    |
|-----|--------|-------|---------|-------|--------|---------------------|----|
|     |        |       |         |       |        | Tetrasiloxane, de   | 47 |
|     |        |       |         |       |        | Cyclotrisiloxane,   | 46 |
| 398 | 50.717 | 12954 | 1383185 | 56967 | 226129 | Tetrasiloxane, de   | 47 |
|     |        |       |         |       |        | Cyclotrisiloxane,   | 43 |
|     |        |       |         |       |        | Cyclotrisiloxane,   | 43 |
| 399 | 50.752 | 12963 | 3988349 | 57754 | 227260 | Cyclotrisiloxane,   | 49 |
|     |        |       |         |       |        | Tris(tert-butylidin | 47 |
|     |        |       |         |       |        | 1,2-Benzisothiaz    | 47 |
| 400 | 50.916 | 13005 | 7749365 | 57685 | 228808 | Tris(tert-butylidin | 49 |
|     |        |       |         |       |        | Cyclotrisiloxane,   | 49 |
|     |        |       |         |       |        | Cyclotrisiloxane,   | 49 |
| 401 | 51.108 | 13054 | 1038214 | 52876 | 225908 | Cyclotrisiloxane,   | 52 |
|     |        |       |         |       |        | Tris(tert-butylidin | 52 |
|     |        |       |         |       |        | Cyclotrisiloxane,   | 50 |
| 402 | 51.151 | 13065 | 2336526 | 55219 | 228689 | Cyclotrisiloxane,   | 52 |
|     |        |       |         |       |        | Arsenous acid, tr   | 52 |
|     |        |       |         |       |        | Cyclotrisiloxane,   | 52 |
| 403 | 51.229 | 13085 | 1978348 | 50603 | 224831 | Arsenous acid, tr   | 52 |
|     |        |       |         |       |        | Cyclotrisiloxane,   | 52 |
|     |        |       |         |       |        | Tris(tert-butylidin | 52 |
| 404 | 51.311 | 13106 | 1895594 | 47994 | 223056 | Cyclotrisiloxane,   | 49 |
|     |        |       |         |       |        | Cyclotrisiloxane,   | 49 |
|     |        |       |         |       |        | Tetrasiloxane, de   | 47 |
| 405 | 51.412 | 13132 | 7195270 | 47189 | 223233 | Cyclotrisiloxane,   | 46 |
|     |        |       |         |       |        | 1,4-Bis(trimethyl   | 43 |
|     |        |       |         |       |        | Arsenous acid, tr   | 43 |
| 406 | 51.623 | 13186 | 1060399 | 42815 | 220957 | Cyclotrisiloxane,   | 52 |
|     |        |       |         |       |        | Cyclotrisiloxane,   | 52 |
|     |        |       |         |       |        | Tris(tert-butylidin | 49 |
| 407 | 51.674 | 13199 | 1127335 | 40980 | 219613 | Cyclotrisiloxane,   | 53 |
|     |        |       |         |       |        | Arsenous acid, tr   | 49 |
|     |        |       |         |       |        | Tris(tert-butylidin | 49 |
| 408 | 51.737 | 13215 | 1659045 | 42736 | 222006 | Arsenous acid, tr   | 49 |
|     |        |       |         |       |        | Tris(tert-butylidin | 49 |
|     |        |       |         |       |        | Methyltris(trime    | 47 |
| 409 | 51.795 | 13230 | 1595106 | 39016 | 218842 | Cyclotrisiloxane,   | 49 |
|     |        |       |         |       |        | Cyclotrisiloxane,   | 47 |
|     |        |       |         |       |        | Tetrasiloxane, de   | 47 |
| 410 | 51.862 | 13247 | 739312  | 37929 | 218419 | Cyclotrisiloxane,   | 53 |
|     |        |       |         |       |        | Tetrasiloxane, de   | 47 |
|     |        |       |         |       |        | Tris(tert-butylidin | 47 |
| 411 | 51.905 | 13258 | 1109195 | 37821 | 218761 | Tris(tert-butylidin | 49 |
|     |        |       |         |       |        | Arsenous acid, tr   | 47 |
|     |        |       |         |       |        | Cyclotrisiloxane,   | 47 |
| 412 | 51.956 | 13271 | 1887701 | 38781 | 220216 | Cyclotrisiloxane,   | 52 |
|     |        |       |         |       |        | Cyclotrisiloxane,   | 49 |
|     |        |       |         |       |        | Arsenous acid, tr   | 47 |

|     |        |       |         |       |        |                     |    |
|-----|--------|-------|---------|-------|--------|---------------------|----|
| 413 | 52.038 | 13292 | 1401639 | 36811 | 219069 | Cyclotrisiloxane,   | 49 |
|     |        |       |         |       |        | Arsenous acid, tr   | 47 |
|     |        |       |         |       |        | Tetrasiloxane, de   | 47 |
| 414 | 52.112 | 13311 | 1138721 | 38166 | 221141 | Cyclotrisiloxane,   | 46 |
|     |        |       |         |       |        | Cyclotrisiloxane,   | 46 |
|     |        |       |         |       |        | Arsenous acid, tr   | 43 |
| 415 | 52.292 | 13357 | 4527882 | 36829 | 221583 | Tris(tert-butylidin | 49 |
|     |        |       |         |       |        | Cyclotrisiloxane,   | 49 |
|     |        |       |         |       |        | Arsenous acid, tr   | 46 |
| 416 | 52.382 | 13380 | 1279265 | 34224 | 219853 | Arsenous acid, tr   | 52 |
|     |        |       |         |       |        | Cyclotrisiloxane,   | 49 |
|     |        |       |         |       |        | Cyclotrisiloxane,   | 47 |
| 417 | 52.468 | 13402 | 2445861 | 33992 | 220499 | Cyclotrisiloxane,   | 49 |
|     |        |       |         |       |        | Methyltris(trimeth  | 47 |
|     |        |       |         |       |        | 1,2-Benzisothiazol  | 47 |
| 418 | 52.565 | 13427 | 2431304 | 33071 | 220538 | Tetrasiloxane, de   | 53 |
|     |        |       |         |       |        | Arsenous acid, tr   | 52 |
|     |        |       |         |       |        | Tris(tert-butylidin | 52 |
| 419 | 52.71  | 13464 | 1714640 | 28307 | 217194 | Cyclotrisiloxane,   | 53 |
|     |        |       |         |       |        | Cyclotrisiloxane,   | 47 |
|     |        |       |         |       |        | Tris(tert-butylidin | 46 |
| 420 | 52.812 | 13490 | 2182129 | 27109 | 217011 | Tris(tert-butylidin | 47 |
|     |        |       |         |       |        | Tetrasiloxane, de   | 47 |
|     |        |       |         |       |        | Arsenous acid, tr   | 47 |
| 421 | 52.952 | 13526 | 2472798 | 25783 | 217052 | Cyclotrisiloxane,   | 46 |
|     |        |       |         |       |        | Tris(tert-butylidin | 46 |
|     |        |       |         |       |        | Arsenous acid, tr   | 46 |
| 422 | 53.202 | 13590 | 3287569 | 21812 | 215579 | Tris(tert-butylidin | 49 |
|     |        |       |         |       |        | Tetrasiloxane, de   | 47 |
|     |        |       |         |       |        | Cyclotrisiloxane,   | 46 |
| 423 | 53.417 | 13645 | 708297  | 19292 | 215191 | Tris(tert-butylidin | 49 |
|     |        |       |         |       |        | Cyclotrisiloxane,   | 49 |
|     |        |       |         |       |        | Arsenous acid, tr   | 47 |
| 424 | 53.48  | 13661 | 2526218 | 20839 | 217332 | Tris(tert-butylidin | 49 |
|     |        |       |         |       |        | Cyclotrisiloxane,   | 46 |
|     |        |       |         |       |        | Cyclotrisiloxane,   | 43 |
| 425 | 53.734 | 13726 | 2238233 | 17966 | 216991 | Cyclotrisiloxane,   | 49 |
|     |        |       |         |       |        | Arsenous acid, tr   | 47 |
|     |        |       |         |       |        | 1,2-Benzisothiazol  | 47 |
| 426 | 54.074 | 13813 | 903340  | 12104 | 214487 | Cyclotrisiloxane,   | 52 |
|     |        |       |         |       |        | 1,1,1,3,5,5,5-Hex   | 50 |
|     |        |       |         |       |        | Arsenous acid, tr   | 50 |
| 427 | 54.18  | 13840 | 1487920 | 11473 | 214920 | Cyclotrisiloxane,   | 46 |
|     |        |       |         |       |        | Tris(tert-butylidin | 46 |
|     |        |       |         |       |        | Cyclotrisiloxane,   | 43 |
| 428 | 54.578 | 13942 | 456249  | 6868  | 214253 | Arsenous acid, tr   | 49 |
|     |        |       |         |       |        | Cyclotrisiloxane,   | 49 |

|     |        |       |        |      |        |                     |    |
|-----|--------|-------|--------|------|--------|---------------------|----|
|     |        |       |        |      |        | Cyclotrisiloxane,   | 49 |
| 429 | 54.715 | 13977 | 262127 | 4135 | 212846 | Tris(tert-butylidin | 49 |
|     |        |       |        |      |        | Cyclotrisiloxane,   | 49 |
|     |        |       |        |      |        | Methyltris(trime    | 47 |
| 430 | 54.813 | 14002 | 298632 | 3400 | 213082 | Tris(tert-butylidin | 52 |
|     |        |       |        |      |        | Cyclotrisiloxane,   | 52 |
|     |        |       |        |      |        | Cyclotrisiloxane,   | 52 |
