# Supplementary material for: Solvent processing for improved separation of hydrothermal liquefaction products
Source: Royal Society of Chemistry journal article supplement (doi:10.1039/d4se00516c), 2024-01-01
Supplement: d4se00516c3.pdf [file d4se00516c3.pdf]

GC-MS of organic extract from hydro-char slurry.

Toluene was mixed with the slurry at a ratio of 1:14 (slurry to solvent). Please refer to S26 for the GC-MS. graphs.

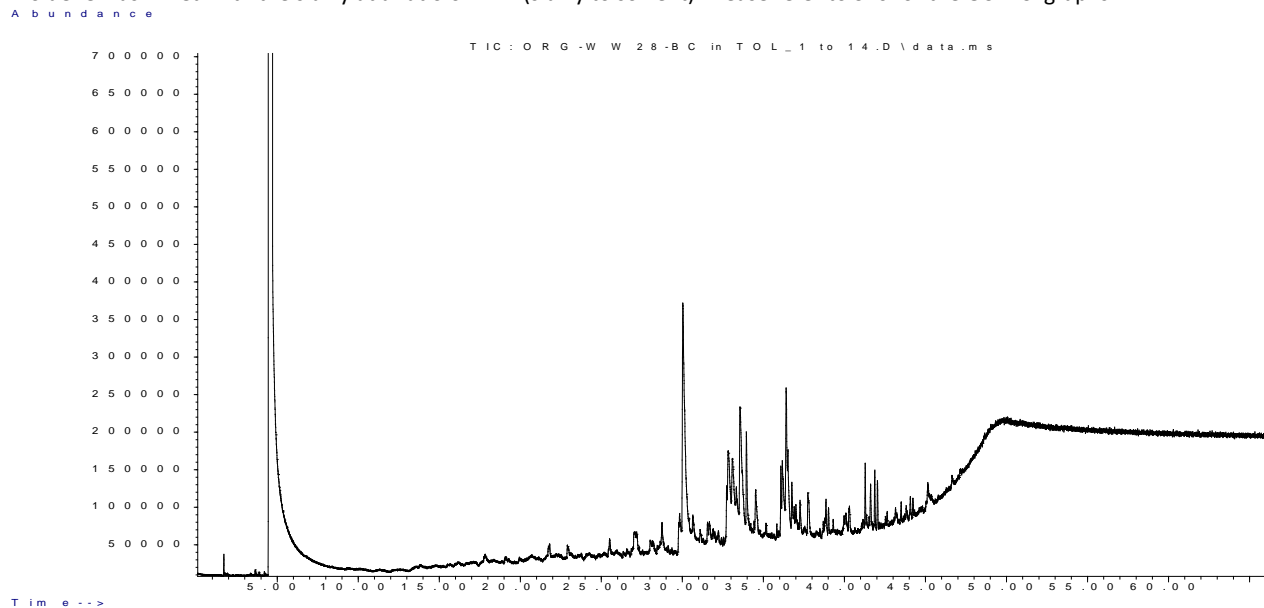

Data file Name :D:\MassHunter\GCMS\1\data\23-JAN-27-Uriah\ORG-WW28-BC in TOL\_1 to 14.D

Acquired date :27 Jan 2023 13:33

Method Name :D:\MassHunter\GCMS\1\methods\61309-W-FID-INSTALLED.M

**Sample Name :ORG-WW28-BC in TOL\_1 to 14**

Library #1 :D:\MassHunter\Databases\NIST11.L

Library #2 :

Library #3 :

| Compound number (#) | RT (min) | Scan number (#) | Area (Ab*s) | Baseline Heigth (Ab) | Absolute Heigth (Ab) | Hit Name                 | Quality |
|---------------------|----------|-----------------|-------------|----------------------|----------------------|--------------------------|---------|
| 1                   | 1.71     | 415             | 387933      | 28482                | 36886                | Nitrous oxide            | 2       |
|                     |          |                 |             |                      |                      | Nitrous oxide            | 2       |
|                     |          |                 |             |                      |                      | Carbon dioxide           | 2       |
| 2                   | 1.749    | 425             | 134822      | 4825                 | 13234                | Hydrogen sulfide         | 9       |
|                     |          |                 |             |                      |                      | Phosphine                | 7       |
|                     |          |                 |             |                      |                      | Propane                  | 4       |
| 3                   | 1.932    | 472             | 164287      | 3793                 | 12219                | Methanethiol             | 50      |
|                     |          |                 |             |                      |                      | Methanethiol             | 7       |
|                     |          |                 |             |                      |                      | Ethane, fluoro-          | 5       |
| 4                   | 2.972    | 738             | 81622       | 1108                 | 9639                 | Propane                  | 3       |
|                     |          |                 |             |                      |                      | Propane                  | 3       |
|                     |          |                 |             |                      |                      | Propane                  | 3       |
| 5                   | 3.371    | 840             | 230694      | 3423                 | 11994                | 2,3,4,5-Tetrahydropyridi | 5       |
|                     |          |                 |             |                      |                      | 2-Pentene, 3-methyl-     | 4       |
|                     |          |                 |             |                      |                      | 2-Pentene, 3-methyl-, (E | 4       |
| 6                   | 3.648    | 911             | 303190      | 8021                 | 16620                | 1-Pentene, 2,4,4-trimetf | 59      |

|    |       |      |           |          |          |                             |    |
|----|-------|------|-----------|----------|----------|-----------------------------|----|
|    |       |      |           |          |          | 1-Pentene, 2,4,4-trimethyl  | 53 |
|    |       |      |           |          |          | 1-Pentene, 2,4,4-trimethyl  | 53 |
| 7  | 3.883 | 971  | 128371    | 4698     | 13321    | 2-Pentene, 2,4,4-trimethyl  | 86 |
|    |       |      |           |          |          | 2-Pentene, 3,4,4-trimethyl  | 80 |
|    |       |      |           |          |          | Z-3,4,4-Trimethyl-2-pentene | 64 |
| 8  | 4.215 | 1056 | 142709    | 5296     | 14068    | 1H-Pyrrole, 1-methyl-       | 53 |
|    |       |      |           |          |          | 1H-Pyrrole, 1-methyl-       | 9  |
|    |       |      |           |          |          | 1,3,5-Hexatriene, (E)-      | 9  |
| 9  | 4.297 | 1077 | 75741     | 1793     | 10617    | Cyclobutane, (1-methyl)-    | 50 |
|    |       |      |           |          |          | Cyclopentane, 1-methyl-     | 50 |
|    |       |      |           |          |          | Cyclopentene, 4,4-dimethyl- | 9  |
| 10 | 4.692 | 1178 | 3.871E+09 | 28809100 | 28818172 | Toluene                     | 95 |
|    |       |      |           |          |          | Toluene                     | 91 |
|    |       |      |           |          |          | Toluene                     | 91 |
| 11 | 6.134 | 1547 | 1254596   | 38854    | 48835    | Toluene                     | 91 |
|    |       |      |           |          |          | Toluene                     | 91 |
|    |       |      |           |          |          | Toluene                     | 91 |
| 12 | 6.177 | 1558 | 5927695   | 37797    | 47805    | Toluene                     | 94 |
|    |       |      |           |          |          | Toluene                     | 91 |
|    |       |      |           |          |          | Toluene                     | 91 |
| 13 | 6.478 | 1635 | 3457109   | 29268    | 39465    | Toluene                     | 90 |
|    |       |      |           |          |          | Toluene                     | 90 |
|    |       |      |           |          |          | Toluene                     | 87 |
| 14 | 6.693 | 1690 | 909412    | 25282    | 35616    | Toluene                     | 91 |
|    |       |      |           |          |          | Toluene                     | 91 |
|    |       |      |           |          |          | Toluene                     | 86 |
| 15 | 6.759 | 1707 | 2315306   | 24718    | 35093    | Toluene                     | 91 |
|    |       |      |           |          |          | Toluene                     | 91 |
|    |       |      |           |          |          | Toluene                     | 91 |
| 16 | 6.915 | 1747 | 2039589   | 22632    | 33105    | Toluene                     | 91 |
|    |       |      |           |          |          | Toluene                     | 91 |
|    |       |      |           |          |          | Toluene                     | 90 |
| 17 | 7.084 | 1790 | 1673879   | 20143    | 30721    | Toluene                     | 91 |
|    |       |      |           |          |          | Toluene                     | 91 |
|    |       |      |           |          |          | Toluene                     | 91 |
| 18 | 7.228 | 1827 | 912777    | 18351    | 29020    | Toluene                     | 91 |
|    |       |      |           |          |          | Toluene                     | 90 |
|    |       |      |           |          |          | Toluene                     | 86 |
| 19 | 7.318 | 1850 | 570938    | 17747    | 28475    | Toluene                     | 91 |
|    |       |      |           |          |          | Toluene                     | 91 |
|    |       |      |           |          |          | Toluene                     | 91 |
| 20 | 7.49  | 1894 | 1146533   | 15567    | 26402    | Toluene                     | 91 |
|    |       |      |           |          |          | Toluene                     | 90 |
|    |       |      |           |          |          | Toluene                     | 90 |
| 21 | 7.642 | 1933 | 826732    | 14649    | 25581    | Toluene                     | 91 |
|    |       |      |           |          |          | Toluene                     | 90 |
|    |       |      |           |          |          | Toluene                     | 90 |

|    |       |      |         |       |       |         |    |
|----|-------|------|---------|-------|-------|---------|----|
| 22 | 7.724 | 1954 | 1322730 | 13501 | 24485 | Toluene | 91 |
|    |       |      |         |       |       | Toluene | 91 |
|    |       |      |         |       |       | Toluene | 90 |
| 23 | 7.916 | 2003 | 360230  | 11813 | 22918 | Toluene | 90 |
|    |       |      |         |       |       | Toluene | 90 |
|    |       |      |         |       |       | Toluene | 80 |
| 24 | 7.967 | 2016 | 408763  | 11427 | 22563 | Toluene | 90 |
|    |       |      |         |       |       | Toluene | 86 |
|    |       |      |         |       |       | Toluene | 83 |
| 25 | 8.022 | 2030 | 943206  | 10819 | 21990 | Toluene | 91 |
|    |       |      |         |       |       | Toluene | 91 |
|    |       |      |         |       |       | Toluene | 90 |
| 26 | 8.229 | 2083 | 516764  | 10199 | 21500 | Toluene | 90 |
|    |       |      |         |       |       | Toluene | 86 |
|    |       |      |         |       |       | Toluene | 83 |
| 27 | 8.287 | 2098 | 565918  | 9376  | 20715 | Toluene | 91 |
|    |       |      |         |       |       | Toluene | 86 |
|    |       |      |         |       |       | Toluene | 86 |
| 28 | 8.389 | 2124 | 210837  | 9991  | 21392 | Toluene | 86 |
|    |       |      |         |       |       | Toluene | 78 |
|    |       |      |         |       |       | Toluene | 64 |
| 29 | 8.428 | 2134 | 743367  | 9153  | 20578 | Toluene | 90 |
|    |       |      |         |       |       | Toluene | 90 |
|    |       |      |         |       |       | Toluene | 86 |
| 30 | 8.577 | 2172 | 753076  | 8506  | 20026 | Toluene | 90 |
|    |       |      |         |       |       | Toluene | 90 |
|    |       |      |         |       |       | Toluene | 90 |
| 31 | 8.737 | 2213 | 372846  | 7149  | 18771 | Toluene | 86 |
|    |       |      |         |       |       | Toluene | 86 |
|    |       |      |         |       |       | Toluene | 78 |
| 32 | 8.838 | 2239 | 213466  | 6852  | 18538 | Toluene | 90 |
|    |       |      |         |       |       | Toluene | 90 |
|    |       |      |         |       |       | Toluene | 90 |
| 33 | 8.92  | 2260 | 716607  | 7201  | 18938 | Toluene | 80 |
|    |       |      |         |       |       | Toluene | 80 |
|    |       |      |         |       |       | Toluene | 80 |
| 34 | 9.073 | 2299 | 226591  | 6553  | 18387 | Toluene | 80 |
|    |       |      |         |       |       | Toluene | 72 |
|    |       |      |         |       |       | Toluene | 72 |
| 35 | 9.135 | 2315 | 144444  | 6083  | 17956 | Toluene | 86 |
|    |       |      |         |       |       | Toluene | 86 |
|    |       |      |         |       |       | Toluene | 86 |
| 36 | 9.182 | 2327 | 199274  | 6202  | 18104 | Toluene | 86 |
|    |       |      |         |       |       | Toluene | 80 |
|    |       |      |         |       |       | Toluene | 78 |
| 37 | 9.37  | 2375 | 1104925 | 7147  | 19168 | Toluene | 64 |
|    |       |      |         |       |       | Toluene | 64 |

|    |        |      |        |      |                                    |    |
|----|--------|------|--------|------|------------------------------------|----|
|    |        |      |        |      | Toluene                            | 59 |
| 38 | 9.538  | 2418 | 697537 | 6503 | 18629 Toluene                      | 80 |
|    |        |      |        |      | Spiro[2,4]hepta-4,6-dien           | 72 |
|    |        |      |        |      | Cyclobutene, 2-propenyl            | 72 |
| 39 | 9.729  | 2467 | 113317 | 5896 | 18142 Toluene                      | 80 |
|    |        |      |        |      | Toluene                            | 64 |
|    |        |      |        |      | Toluene                            | 59 |
| 40 | 9.784  | 2481 | 296935 | 5535 | 17816 Toluene                      | 86 |
|    |        |      |        |      | Toluene                            | 72 |
|    |        |      |        |      | Spiro[2,4]hepta-4,6-dien           | 72 |
| 41 | 9.886  | 2507 | 999141 | 5868 | 18213 Spiro[2,4]hepta-4,6-dien     | 59 |
|    |        |      |        |      | Toluene                            | 59 |
|    |        |      |        |      | Cyclobutene, 2-propenyl            | 53 |
| 42 | 10.214 | 2591 | 368839 | 5389 | 17941 Toluene                      | 52 |
|    |        |      |        |      | Benzyl oxy tridecanoic acid        | 36 |
|    |        |      |        |      | Benzyl isopentyl ether             | 33 |
| 43 | 10.32  | 2618 | 343020 | 5065 | 17682 Toluene                      | 50 |
|    |        |      |        |      | Toluene                            | 40 |
|    |        |      |        |      | Toluene                            | 40 |
| 44 | 10.46  | 2654 | 503773 | 4757 | 17464 Toluene                      | 64 |
|    |        |      |        |      | Cyclobutene, 2-propenyl            | 59 |
|    |        |      |        |      | Toluene                            | 59 |
| 45 | 10.718 | 2720 | 84773  | 2848 | 15718 1,3,5-Cycloheptatriene       | 64 |
|    |        |      |        |      | Spiro[2,4]hepta-4,6-dien           | 9  |
|    |        |      |        |      | 1,3,5-Cycloheptatriene             | 9  |
| 46 | 10.812 | 2744 | 153246 | 2922 | 15850 Bicyclo[3.2.0]hepta-2,6-dien | 9  |
|    |        |      |        |      | Spiro[2,4]hepta-4,6-dien           | 7  |
|    |        |      |        |      | 1,3,5-Cycloheptatriene             | 7  |
| 47 | 10.91  | 2769 | 86481  | 2263 | 15254 Toluene                      | 40 |
|    |        |      |        |      | Toluene                            | 40 |
|    |        |      |        |      | Toluene                            | 40 |
| 48 | 11.097 | 2817 | 201263 | 3249 | 16358 Toluene                      | 52 |
|    |        |      |        |      | Toluene                            | 38 |
|    |        |      |        |      | Toluene                            | 38 |
| 49 | 11.14  | 2828 | 73617  | 3422 | 16557 Toluene                      | 43 |
|    |        |      |        |      | Toluene                            | 43 |
|    |        |      |        |      | Toluene                            | 43 |
| 50 | 11.258 | 2858 | 237229 | 3511 | 16721 Toluene                      | 43 |
|    |        |      |        |      | Toluene                            | 38 |
|    |        |      |        |      | Toluene                            | 37 |
| 51 | 11.363 | 2885 | 200992 | 3931 | 17208 Toluene                      | 43 |
|    |        |      |        |      | Toluene                            | 38 |
|    |        |      |        |      | Toluene                            | 38 |
| 52 | 11.41  | 2897 | 151135 | 3252 | 16556 Phenylethyl Alcohol          | 38 |
|    |        |      |        |      | Toluene                            | 38 |
|    |        |      |        |      | 9,10-Epoxy-4,8-ethanocycloheptane  | 38 |
| 53 | 11.496 | 2919 | 145222 | 2950 | 16308 Toluene                      | 32 |

|    |        |      |        |      |                                                             |    |
|----|--------|------|--------|------|-------------------------------------------------------------|----|
|    |        |      |        |      | Toluene                                                     | 32 |
|    |        |      |        |      | Toluene                                                     | 32 |
| 54 | 11.617 | 2950 | 124325 | 2571 | 16006 Toluene                                               | 43 |
|    |        |      |        |      | Toluene                                                     | 37 |
|    |        |      |        |      | Toluene                                                     | 9  |
| 55 | 11.695 | 2970 | 126170 | 2299 | 15785 Toluene                                               | 49 |
|    |        |      |        |      | Toluene                                                     | 47 |
|    |        |      |        |      | Toluene                                                     | 47 |
| 56 | 12.157 | 3088 | 210873 | 3076 | 16867 Toluene                                               | 32 |
|    |        |      |        |      | Bicyclo[3.2.0]hepta-2,6-diene                               | 25 |
|    |        |      |        |      | 1,3,5-Cycloheptatriene                                      | 25 |
| 57 | 12.286 | 3121 | 187363 | 2833 | 16720 L-Glutamic acid, N-[(phenylethyl)amino]propanoic acid | 10 |
|    |        |      |        |      | Toluene                                                     | 9  |
|    |        |      |        |      | Toluene                                                     | 9  |
| 58 | 12.407 | 3152 | 80413  | 3118 | 17092 L-Glutamic acid, N-[(phenylethyl)amino]propanoic acid | 27 |
|    |        |      |        |      | 1,3,5-Cycloheptatriene                                      | 25 |
|    |        |      |        |      | Toluene                                                     | 22 |
| 59 | 12.524 | 3182 | 85777  | 3085 | 17145 L-Glutamic acid, N-[(phenylethyl)amino]propanoic acid | 35 |
|    |        |      |        |      | 1,5-Dimethyl-1,4-cyclohexadiene                             | 32 |
|    |        |      |        |      | Toluene                                                     | 25 |
| 60 | 12.579 | 3196 | 110638 | 3374 | 17474 9,10-Epoxy-4,8-ethanocycloheptane                     | 38 |
|    |        |      |        |      | N-(Benzyloxycarbonyl)-3-aminopropanoic acid                 | 32 |
|    |        |      |        |      | Benzene, [(2-propenyloxy)bis(methylamino)]-                 | 28 |
| 61 | 12.637 | 3211 | 385400 | 3143 | 17287 1,5-Dimethyl-1,4-cyclohexadiene                       | 23 |
|    |        |      |        |      | 1,4-Cyclohexadiene, 1,2-dimethyl-                           | 23 |
|    |        |      |        |      | Tricyclo[3.2.1.0(2,4)]octane                                | 12 |
| 62 | 13.016 | 3308 | 74107  | 1654 | 16074 N-Carbobenzyloxy-glycyl-L-proline                     | 25 |
|    |        |      |        |      | Tricyclo[3.2.1.0(2,4)]octane                                | 12 |
|    |        |      |        |      | Toluene                                                     | 9  |
| 63 | 13.376 | 3400 | 483158 | 4827 | 19677 Phenylethyl Alcohol                                   | 38 |
|    |        |      |        |      | Phenylethyl Alcohol                                         | 35 |
|    |        |      |        |      | Phenylethyl Alcohol                                         | 35 |
| 64 | 13.575 | 3451 | 518720 | 5952 | 21069 Phenylethyl Alcohol                                   | 27 |
|    |        |      |        |      | 1-Methylbicyclo[2.2.1]heptane                               | 14 |
|    |        |      |        |      | Silane, (4-methylphenyl)-                                   | 14 |
| 65 | 13.626 | 3464 | 123348 | 5981 | 21167 Ether, 2,4,6-cycloheptatriene                         | 43 |
|    |        |      |        |      | Phenylethyl Alcohol                                         | 38 |
|    |        |      |        |      | Pyrazine, 2-ethyl-3-methyl-                                 | 38 |
| 66 | 13.665 | 3474 | 161769 | 5393 | 20634 Phenylethyl Alcohol                                   | 30 |
|    |        |      |        |      | Silane, (4-methylphenyl)-                                   | 27 |
|    |        |      |        |      | Benzene, (methoxymethyl)-                                   | 22 |
| 67 | 13.825 | 3515 | 998611 | 7698 | 23157 Phenylethyl Alcohol                                   | 27 |
|    |        |      |        |      | Silane, (4-methylphenyl)-                                   | 27 |
|    |        |      |        |      | Phenylethyl Alcohol                                         | 27 |
| 68 | 14.001 | 3560 | 120453 | 5133 | 20827 N-Carbobenzyloxy-glycyl-L-proline                     | 22 |
|    |        |      |        |      | Phenylethyl Alcohol                                         | 22 |
|    |        |      |        |      | Phenylethyl Alcohol                                         | 22 |

|    |        |      |        |      |       |                                      |    |
|----|--------|------|--------|------|-------|--------------------------------------|----|
| 69 | 14.048 | 3572 | 165746 | 5184 | 20944 | Phenylethyl Alcohol                  | 14 |
|    |        |      |        |      |       | Phenylethyl Alcohol                  | 14 |
|    |        |      |        |      |       | Toluene                              | 11 |
| 70 | 14.087 | 3582 | 308809 | 4790 | 20600 | Phenylethyl Alcohol                  | 35 |
|    |        |      |        |      |       | Benzene, 1,1'-[oxybis(methoxy)]-     | 22 |
|    |        |      |        |      |       | Pyridine, 3-ethyl-                   | 22 |
| 71 | 14.216 | 3615 | 98506  | 4021 | 20010 | Phenylethyl Alcohol                  | 14 |
|    |        |      |        |      |       | Phenylethyl Alcohol                  | 14 |
|    |        |      |        |      |       | Benzene, (methoxymethyl)-            | 11 |
| 72 | 14.369 | 3654 | 637162 | 4424 | 20618 | (2-Methyl-cyclohex-2-en-1-yl)-       | 25 |
|    |        |      |        |      |       | 2-Methyl-3-isopropylpyridine         | 22 |
|    |        |      |        |      |       | Benzene, 1-ethoxy-3-methyl-          | 18 |
| 73 | 14.568 | 3705 | 166240 | 5206 | 21673 | 2-Methyl-3-isopropylpyridine         | 32 |
|    |        |      |        |      |       | 5H-Inden-5-one, 1,2,3,6-tetrahydro-  | 30 |
|    |        |      |        |      |       | Silane, tetraethenyl-                | 14 |
| 74 | 14.619 | 3718 | 273641 | 5469 | 22001 | 5H-Inden-5-one, 1,2,3,6-tetrahydro-  | 35 |
|    |        |      |        |      |       | Pyrazine, 2-methyl-5-propyl-         | 27 |
|    |        |      |        |      |       | 1H-Pyrrole, 2,3,4,5-tetrahydro-      | 25 |
| 75 | 14.74  | 3749 | 378172 | 5949 | 22645 | 2-Methyl-3-isopropylpyridine         | 49 |
|    |        |      |        |      |       | Pyrazine, 2-methyl-5-propyl-         | 35 |
|    |        |      |        |      |       | 5H-Inden-5-one, 1,2,3,6-tetrahydro-  | 35 |
| 76 | 14.814 | 3768 | 100529 | 5523 | 22322 | 2,5-Dimethyl-1-propylpyridine        | 30 |
|    |        |      |        |      |       | 2-Methyl-3-isopropylpyridine         | 30 |
|    |        |      |        |      |       | 1,2,3,5,6,7-Hexahydroindole          | 27 |
| 77 | 14.846 | 3776 | 101545 | 5704 | 22544 | 1,2,5-Trimethylpyrrole               | 38 |
|    |        |      |        |      |       | Pyrazine, 2-methyl-5-propyl-         | 32 |
|    |        |      |        |      |       | 2-Methyl-3-isopropylpyridine         | 30 |
| 78 | 14.869 | 3782 | 256524 | 5844 | 22714 | Pyrazine, 2-methyl-5-propyl-         | 35 |
|    |        |      |        |      |       | Pyridinium, 1-amino-2-naphthyl-      | 27 |
|    |        |      |        |      |       | 3-Acetyl-1-methylpyrrolidine         | 25 |
| 79 | 15.021 | 3821 | 134908 | 4198 | 21276 | Borolo[1,2-a]borine, octahydro-      | 38 |
|    |        |      |        |      |       | Acetic acid, phenyl ester            | 25 |
|    |        |      |        |      |       | 1H-Pyrrole, 4-ethyl-2,3,5-trimethyl- | 22 |
| 80 | 15.076 | 3835 | 220998 | 4599 | 21752 | 1H-Pyrrole, 2,3,4,5-tetrahydro-      | 43 |
|    |        |      |        |      |       | 2-Methyl-3-isopropylpyridine         | 41 |
|    |        |      |        |      |       | (2-Methyl-cyclohex-2-en-1-yl)-       | 35 |
| 81 | 15.158 | 3856 | 96157  | 3970 | 21237 | 5H-Inden-5-one, 1,2,3,6-tetrahydro-  | 14 |
|    |        |      |        |      |       | Borolo[1,2-a]borine, octahydro-      | 14 |
|    |        |      |        |      |       | Pyrazine, 2-(n-propyl)-              | 14 |
| 82 | 15.205 | 3868 | 89209  | 4325 | 21653 | Hydrazine, phenyl-                   | 27 |
|    |        |      |        |      |       | 2-Methyl-3-isopropylpyridine         | 25 |
|    |        |      |        |      |       | 1,2,3,5,6,7-Hexahydroindole          | 22 |
| 83 | 15.244 | 3878 | 169804 | 4491 | 21875 | Pyridinium, 1-amino-2-naphthyl-      | 45 |
|    |        |      |        |      |       | 1H-Pyrrole, 2,3,4,5-tetrahydro-      | 38 |
|    |        |      |        |      |       | 4-Pyridinamine, 2,6-dimethyl-        | 35 |
| 84 | 15.33  | 3900 | 196863 | 3446 | 20946 | Benzene, ethoxy-                     | 25 |
|    |        |      |        |      |       | Borolo[1,2-a]borine, octahydro-      | 22 |

|     |        |      |         |       |                                  |    |
|-----|--------|------|---------|-------|----------------------------------|----|
|     |        |      |         |       | 1,3-Diphenyl-1,2-butane          | 22 |
| 85  | 15.518 | 3948 | 555866  | 6060  | 23814 Pyrazole, 1-vinyl-3,5-dirr | 30 |
|     |        |      |         |       | Bicyclo[2.2.1]heptane, 2         | 27 |
|     |        |      |         |       | Bicyclo[3.2.2]nona-2,6-d         | 25 |
| 86  | 15.686 | 3991 | 710295  | 6644  | 24626 Benzenamine, 4-methox      | 38 |
|     |        |      |         |       | N-(1,1-Dimethylpropyny           | 35 |
|     |        |      |         |       | 2-Pyridinamine, 3,6-dim          | 35 |
| 87  | 15.983 | 4067 | 576886  | 6713  | 25098 4,5-Dimethyl-ortho-pher    | 38 |
|     |        |      |         |       | 2-Methoxy-6-methylanil           | 35 |
|     |        |      |         |       | Erythro-p-amino-.beta.-l         | 27 |
| 88  | 16.143 | 4108 | 517444  | 8097  | 26698 1H-Pyrrole, 3,4-diethyl-2  | 43 |
|     |        |      |         |       | m-Ethylaminophenol               | 43 |
|     |        |      |         |       | Benzene, 1-methoxy-3-n           | 38 |
| 89  | 16.202 | 4123 | 725514  | 7982  | 26662 5-Pyrimidinecarbonitrile   | 27 |
|     |        |      |         |       | Benzenamine, 4-methox            | 27 |
|     |        |      |         |       | Benzenamine, 2-methox            | 25 |
| 90  | 16.409 | 4176 | 320953  | 5434  | 24394 Benzene, 1-ethoxy-2-me     | 43 |
|     |        |      |         |       | 2,2-Dimethyl-3-vinyl-bic         | 30 |
|     |        |      |         |       | Phenol, 2,6-dimethyl-            | 30 |
| 91  | 16.542 | 4210 | 134175  | 3894  | 23036 Benzene, 1-ethoxy-2-me     | 30 |
|     |        |      |         |       | Benzene, 1-ethoxy-3-me           | 30 |
|     |        |      |         |       | Benzene, 1-ethoxy-3-me           | 30 |
| 92  | 16.702 | 4251 | 723099  | 6765  | 26126 Benzene, 1-ethoxy-3-me     | 50 |
|     |        |      |         |       | Benzene, 1-ethoxy-2-me           | 45 |
|     |        |      |         |       | Benzene, 1-ethoxy-2-me           | 38 |
| 93  | 16.811 | 4279 | 123166  | 5819  | 25325 Benzene, 1-ethoxy-2-me     | 46 |
|     |        |      |         |       | Borazine, 1,3-dimethyl-          | 42 |
|     |        |      |         |       | Benzene, 1-ethoxy-4-me           | 41 |
| 94  | 16.917 | 4306 | 712038  | 6942  | 26593 Carbamic acid, methyl-,    | 38 |
|     |        |      |         |       | 1H-Pyrrole, 2,3,5-trimetl        | 38 |
|     |        |      |         |       | Benzene, 1-ethoxy-2-me           | 35 |
| 95  | 17.108 | 4355 | 609465  | 7742  | 27652 Pyrrolidine, 1-(1-cyclope  | 58 |
|     |        |      |         |       | Benzene, 1-ethoxy-2-me           | 43 |
|     |        |      |         |       | Phenol, 2-methyl-                | 35 |
| 96  | 17.191 | 4376 | 120572  | 7231  | 27250 Benzene, 1-ethoxy-4-me     | 46 |
|     |        |      |         |       | Benzene, 1-ethoxy-2-me           | 45 |
|     |        |      |         |       | 5-Methylene-1,3a,4,5,6,          | 38 |
| 97  | 17.23  | 4386 | 650104  | 6788  | 26860 Benzenamine, 4-methox      | 43 |
|     |        |      |         |       | Ammonium, (p-hydroxyf            | 43 |
|     |        |      |         |       | Phenol, 3-(ethylamino)-4         | 43 |
| 98  | 17.546 | 4467 | 408566  | 5862  | 26367 7-methyl-2,3,4,5,6,7-hex   | 49 |
|     |        |      |         |       | 1(2H)-Naphthalenone, 3           | 38 |
|     |        |      |         |       | 2(3H)-Naphthalenone,4,           | 30 |
| 99  | 17.644 | 4492 | 266299  | 7382  | 28015 5H-Inden-5-one, 1,2,3,6,   | 58 |
|     |        |      |         |       | Tropidine, 2-acetyl-8-dei        | 43 |
|     |        |      |         |       | 2(3H)-Naphthalenone, 4           | 38 |
| 100 | 17.839 | 4542 | 2677611 | 15810 | 36710 (1,2,3,3a,4,6a-Hexahydr    | 46 |

|     |        |      |         |       |                                 |    |
|-----|--------|------|---------|-------|---------------------------------|----|
|     |        |      |         |       | Benzene, 1-methoxy-2-n          | 22 |
|     |        |      |         |       | 2,6-Dimethylphenyl acet         | 22 |
| 101 | 18.371 | 4678 | 1819185 | 8629  | 30248 N-(1-Cyclohexen-1-yl)piç  | 41 |
|     |        |      |         |       | Acetic acid, 4-methylphe        | 38 |
|     |        |      |         |       | 4-Methoxyphenyl isothic         | 38 |
| 102 | 18.598 | 4736 | 537357  | 6166  | 28092 Borazine, 2,4,6-triethyl- | 49 |
|     |        |      |         |       | Benzene, 1-ethoxy-4-me          | 46 |
|     |        |      |         |       | 2H-Inden-2-one, 1,4,5,6,        | 41 |
| 103 | 18.883 | 4809 | 605095  | 5692  | 28009 Borazine, 2,4,6-triethyl- | 49 |
|     |        |      |         |       | 6,7-Dimethyltetrazolo[1,        | 38 |
|     |        |      |         |       | Benzene, 1-ethoxy-3-me          | 38 |
| 104 | 19.117 | 4869 | 1172616 | 11253 | 33884 1-Chloro-1-ethoxy-1-sila  | 43 |
|     |        |      |         |       | Naphthalene-D8                  | 38 |
|     |        |      |         |       | 9H-Purine, 6-propoxy-           | 38 |
| 105 | 19.27  | 4908 | 861923  | 8261  | 31100 Borazine, 2,4,6-triethyl- | 55 |
|     |        |      |         |       | 6-Ethoxy-9H-purine              | 35 |
|     |        |      |         |       | Benzene, 1-ethoxy-2-me          | 30 |
| 106 | 19.528 | 4974 | 214555  | 3461  | 26653 Tricyclo[3.3.3.0]undecar  | 38 |
|     |        |      |         |       | N-(1-Cyclohexen-1-yl)piç        | 35 |
|     |        |      |         |       | 2-Acetyl-1-phenylhydraz         | 27 |
| 107 | 19.645 | 5004 | 333442  | 4044  | 27394 Acetamide, N-[1-(4-hydr   | 30 |
|     |        |      |         |       | Benzene, 1-ethoxy-2-me          | 27 |
|     |        |      |         |       | 2H-1-Benzopyran-2-one,          | 22 |
| 108 | 19.95  | 5082 | 732941  | 9341  | 33104 N-(1-Cyclohexen-1-yl)piç  | 38 |
|     |        |      |         |       | N-(1-Cyclohexen-1-yl)piç        | 38 |
|     |        |      |         |       | 3-Methylbenzyl acetate          | 30 |
| 109 | 20.063 | 5111 | 538581  | 5535  | 29449 1-(2-Pyrimidyl)piperazin  | 38 |
|     |        |      |         |       | 1(2H)-Naphthalenone, 3          | 35 |
|     |        |      |         |       | N-(1-Cyclohexen-1-yl)piç        | 27 |
| 110 | 20.302 | 5172 | 379158  | 6815  | 31053 5H-Inden-5-one, 1,2,3,6,  | 43 |
|     |        |      |         |       | Tropidine, 2-acetyl-8-dei       | 25 |
|     |        |      |         |       | Benzenemethanol, .alph          | 18 |
| 111 | 20.7   | 5274 | 3121836 | 11388 | 36166 2-Hydroxy-5-methylisop    | 25 |
|     |        |      |         |       | Ethanone, 1-(2,4-dimeth         | 18 |
|     |        |      |         |       | Acetamide, N-(4-methox          | 18 |
| 112 | 21.052 | 5364 | 527648  | 7842  | 33101 o-Ethoxybenzylamine       | 22 |
|     |        |      |         |       | 2,3,3a,4,5,6,7,7a-Octahy        | 20 |
|     |        |      |         |       | Selenophene, tetrahydr          | 15 |
| 113 | 21.142 | 5387 | 579011  | 7922  | 33302 Imidazole, 4-trifluorome  | 38 |
|     |        |      |         |       | Benzo-1,3,2-oxathiaborc         | 38 |
|     |        |      |         |       | N-Ethyl-3-methoxyanilin         | 35 |
| 114 | 21.294 | 5426 | 234258  | 5264  | 30850 2,3,3a,4,5,6,7,7a-Octahy  | 25 |
|     |        |      |         |       | 2H-Inden-2-one, 1,4,5,6,        | 25 |
|     |        |      |         |       | S-Triazolo[5,1-a]pyrimidi       | 25 |
| 115 | 21.81  | 5558 | 3844493 | 24369 | 50652 Oxalic acid, dodecyl 3,5- | 41 |
|     |        |      |         |       | Oxalic acid, 3,5-difluoroç      | 41 |
|     |        |      |         |       | Ethanol, 2-(dodecyloxy)-        | 30 |



|     |        |      |         |       |       |                                                                                    |                |
|-----|--------|------|---------|-------|-------|------------------------------------------------------------------------------------|----------------|
| 116 | 22.225 | 5664 | 1486759 | 10983 | 37830 | Cyclopentanone, 2-cyclo<br>2(1H)-Naphthalenone, 4<br>4-Pyridinecarboxamide,        | 35<br>25<br>14 |
| 117 | 22.354 | 5697 | 799242  | 9642  | 36666 | 2-Benzothiazolamine, n-<br>Benzamide, N-(1,1-dime<br>(2E)-3-(methylselanyl)pr      | 30<br>27<br>27 |
| 118 | 22.522 | 5740 | 922351  | 8934  | 36182 | Borazine, hexamethyl-<br>1-(5-(2-Methyl-1-propyl)<br>N-(1-Cyclohexen-1-yl)piç      | 30<br>27<br>25 |
| 119 | 22.916 | 5841 | 2159731 | 20873 | 48656 | Bromoacetic acid, hexad<br>Cyclopentane, 1,1,2-trir<br>Trichloroacetic acid, trid  | 80<br>50<br>42 |
| 120 | 23.127 | 5895 | 1236852 | 10927 | 38998 | Pyrrolidine, 1-(1-cyclohe<br>2-Benzothiazolamine, n-<br>2-Benzothiazolamine, N-    | 46<br>35<br>25 |
| 121 | 23.397 | 5964 | 382529  | 6731  | 35166 | Bicyclo[2.2.2]oct-2-ene,<br>4-Ethynyl-2(equatorial),ç<br>5-Chloro-2-thiophenecar   | 11<br>11<br>11 |
| 122 | 23.549 | 6003 | 681405  | 7975  | 36620 | 3H-Indole, 2-ethyl-3,3-di<br>9b-Boraphenalene, dodec<br>2-Methyl-5-(hexyn-1-yl)ç   | 42<br>25<br>14 |
| 123 | 23.694 | 6040 | 353889  | 7414  | 36256 | 3,5-Methano-2,3,4,5(1H<br>3H-Indole, 2-ethyl-3,3-di<br>2H-Isoindole, 4,7-dimetç    | 25<br>18<br>14 |
| 124 | 23.764 | 6058 | 506973  | 9398  | 38333 | 2,5,8-Metheno-2H-furo[<br>Oxalic acid, 3,5-difluoroç<br>Oxalic acid, 3,5-difluoroç | 25<br>18<br>14 |
| 125 | 24.085 | 6140 | 824498  | 7984  | 37353 | 1,2-Diphenyl-1,2-di(1,4-t<br>3-Pentyl-4,5,6,7-tetrahyç<br>5,7-Dihydroxy-4-methylç  | 27<br>22<br>15 |
| 126 | 24.265 | 6186 | 1058052 | 8651  | 38263 | Isoxazole, 5-methyl-3-pç<br>4-Isopropylphenylacetoç<br>2,5-Difluorobenzyl alcoh    | 14<br>14<br>11 |
| 127 | 24.48  | 6241 | 294920  | 5770  | 35674 | 3H-Indole, 2-ethyl-3,3-di<br>2,4(3H,5H)-Furandione,<br>Pyrido[1,2-a]benzimidaz     | 25<br>15<br>14 |
| 128 | 24.558 | 6261 | 312922  | 6116  | 36128 | 1H-Cyclodecapyrazole, 4<br>Benzenemethanol, .alph<br>4-Hydroxy-2-methoxycir        | 25<br>18<br>18 |
| 129 | 24.702 | 6298 | 174455  | 3754  | 33962 | 4(3H)-Pteridinone, 3-me<br>Benzene, 1-methyl-4-(1-<br>Benzene, 1-methyl-4-(1-      | 35<br>30<br>27 |
| 130 | 24.812 | 6326 | 734100  | 7043  | 37401 | 6,10-Dimethylspiro[4,5]ç<br>N-(1-Cyclohexen-1-yl)piç<br>N-(1-Cyclohexen-1-yl)piç   | 42<br>30<br>22 |
| 131 | 24.996 | 6373 | 194186  | 6522  | 37126 | Imidazolidine-1-carboxal<br>Sulfanilamide                                          | 38<br>38       |

|     |        |      |         |       |                                        |    |
|-----|--------|------|---------|-------|----------------------------------------|----|
|     |        |      |         |       | 1,3,2-Dioxaphosphorina                 | 38 |
| 132 | 25.187 | 6422 | 1296437 | 8632  | 39497 2,4(3H,5H)-Furandione,           | 15 |
|     |        |      |         |       | 2,4(3H,5H)-Furandione,                 | 15 |
|     |        |      |         |       | 2,4(3H,5H)-Furandione,                 | 15 |
| 133 | 25.515 | 6506 | 2044051 | 26254 | 57563 Tridecane                        | 38 |
|     |        |      |         |       | Tetrapentacontane, 1,54                | 38 |
|     |        |      |         |       | Tetradecane                            | 35 |
| 134 | 25.695 | 6552 | 542352  | 8524  | 40078 Anthracene, 1,2,3,4,5,6,         | 18 |
|     |        |      |         |       | Anthracene, 1,2,3,4,5,6,               | 18 |
|     |        |      |         |       | 3H-Indole, 2-ethyl-3,3-di              | 14 |
| 135 | 25.957 | 6619 | 1459068 | 10737 | 42646 Diethyl-.alpha.-naphthyl         | 45 |
|     |        |      |         |       | .alpha.-Methyl-n-propar                | 43 |
|     |        |      |         |       | Diethyl-.alpha.-naphthyl               | 35 |
| 136 | 26.121 | 6661 | 251647  | 6353  | 38486 Benzene, 1-bromo-3-me            | 18 |
|     |        |      |         |       | Benzene, 1-bromo-3-me                  | 18 |
|     |        |      |         |       | 3-Pyridinecarboxamide,                 | 15 |
| 137 | 26.195 | 6680 | 213842  | 5620  | 37852 2-Benzylcyclopentaneca           | 45 |
|     |        |      |         |       | Benzyl methacrylate                    | 43 |
|     |        |      |         |       | Benzene, 1-bromo-2-me                  | 43 |
| 138 | 26.364 | 6723 | 537729  | 8021  | 40482 Diethyl-.alpha.-naphthyl         | 80 |
|     |        |      |         |       | Benzenamine, 4-methox                  | 27 |
|     |        |      |         |       | 2,6-Dimethyl-4,4-tetram                | 25 |
| 139 | 26.575 | 6777 | 661637  | 10808 | 43554 7,8,9,10-Tetrahydro-6(5)         | 46 |
|     |        |      |         |       | Pyridine, 2-[(4-methoxy                | 43 |
|     |        |      |         |       | 2-Amino-4-isopropylami                 | 35 |
| 140 | 26.688 | 6806 | 444026  | 7359  | 40260 Benzene, 1-(ethenylsulf          | 25 |
|     |        |      |         |       | Pyrimidine-2,4,6(1H,3H,)               | 18 |
|     |        |      |         |       | 2-Nitro-4-amino-1,5-dim                | 15 |
| 141 | 27.075 | 6905 | 3992630 | 33279 | 66700 2,3-Dihydro-8-methylfur          | 51 |
|     |        |      |         |       | Tetradecanoic acid                     | 45 |
|     |        |      |         |       | Tetradecanoic acid                     | 45 |
| 142 | 27.176 | 6931 | 2036608 | 32332 | 65893 Cyclotridecane                   | 95 |
|     |        |      |         |       | Pentafluoropropionic ac                | 83 |
|     |        |      |         |       | Pentafluoropropionic ac                | 83 |
| 143 | 27.329 | 6970 | 719062  | 12908 | 46675 3,5-Octadienoic acid, 7- $\beta$ | 11 |
|     |        |      |         |       | N,N'-(4,5-Dimethyl-1,3-p               | 11 |
|     |        |      |         |       | Spiro[5.5]undecane-1,7-                | 10 |
| 144 | 27.544 | 7025 | 522245  | 8442  | 42499 Phenol, 4-(phenylamino)          | 43 |
|     |        |      |         |       | Sulfanilamide                          | 38 |
|     |        |      |         |       | 1H-2,1,3-Benzothiadiazir               | 35 |
| 145 | 27.786 | 7087 | 898503  | 6067  | 40456 2,4(3H,5H)-Furandione,           | 35 |
|     |        |      |         |       | Benzenepropanoic acid,                 | 35 |
|     |        |      |         |       | 2,4(3H,5H)-Furandione,                 | 35 |
| 146 | 28.029 | 7149 | 1718701 | 20300 | 55018 n-Decanoic acid                  | 47 |
|     |        |      |         |       | Pentadecanoic acid                     | 38 |
|     |        |      |         |       | Dodecanoic acid                        | 35 |
| 147 | 28.173 | 7186 | 1886051 | 19461 | 54373 O-Trimethylsilyl-3-quinu         | 25 |

|     |        |      |          |        |                                  |    |
|-----|--------|------|----------|--------|----------------------------------|----|
|     |        |      |          |        | Silane, [(4-methoxycyclo         | 14 |
|     |        |      |          |        | 2,4,6-Tri-O-acetyl-1,5-an        | 10 |
| 148 | 28.748 | 7333 | 5648245  | 43518  | 79209 Cyclotetradecane           | 98 |
|     |        |      |          |        | Cyclotetradecane                 | 96 |
|     |        |      |          |        | Cyclotridecane                   | 96 |
| 149 | 29.033 | 7406 | 459110   | 9666   | 45743 p-Benzoquinone, 2-meth     | 10 |
|     |        |      |          |        | Bicyclo[4.1.0]heptan-2-c         | 10 |
|     |        |      |          |        | Acetamide, 2-(2,4-dichlo         | 10 |
| 150 | 29.135 | 7432 | 568897   | 11250  | 47466 Pentadecanenitrile         | 30 |
|     |        |      |          |        | Pentadecanenitrile               | 27 |
|     |        |      |          |        | 1(2H)-Naphthalenone, o           | 25 |
| 151 | 29.353 | 7488 | 410157   | 8320   | 44834 Dodecanoic acid, 10-meth   | 43 |
|     |        |      |          |        | Heptanedioic acid, 2-pro         | 22 |
|     |        |      |          |        | Propionic acid, 3-(allylth       | 15 |
| 152 | 29.533 | 7534 | 417779   | 5264   | 42022 2,4-Pyrimidinedione,1,2,   | 45 |
|     |        |      |          |        | Benzene, 1-bromo-4-me            | 27 |
|     |        |      |          |        | Benzene, 1,2-dichloro-4-         | 27 |
| 153 | 29.834 | 7611 | 5061939  | 53533  | 90848 Palmitoleic acid           | 99 |
|     |        |      |          |        | cis-9-Hexadecenoic acid          | 97 |
|     |        |      |          |        | Hexadecenoic acid, Z-11          | 95 |
| 154 | 30.037 | 7663 | 41619352 | 330202 | 368018 n-Hexadecanoic acid       | 99 |
|     |        |      |          |        | n-Hexadecanoic acid              | 99 |
|     |        |      |          |        | n-Hexadecanoic acid              | 98 |
| 155 | 30.651 | 7820 | 6459041  | 48121  | 87452 Tetradecanamide            | 76 |
|     |        |      |          |        | Dodecanamide                     | 62 |
|     |        |      |          |        | Hexadecanamide                   | 53 |
| 156 | 30.964 | 7900 | 1253336  | 18290  | 58385 2-Methyl-Z-4-tetradecer    | 56 |
|     |        |      |          |        | 4-Methyl-dodec-3-en-1-ri         | 46 |
|     |        |      |          |        | Cyclododecane, ethyl-            | 38 |
| 157 | 31.1   | 7935 | 2135566  | 29436  | 69874 Hexanal, O-methyloxime     | 38 |
|     |        |      |          |        | N-Methyldodecanamide             | 30 |
|     |        |      |          |        | Tridecanoic acid                 | 18 |
| 158 | 31.288 | 7983 | 1419162  | 16751  | 57650 4-Acetyl-3-amino-5-buty    | 32 |
|     |        |      |          |        | 3,7-Dimethyl-8-oxo-1,5-ri        | 11 |
|     |        |      |          |        | 4-Pentadecanol                   | 10 |
| 159 | 31.437 | 8021 | 580881   | 14140  | 55398 4-Quinololinol, 4-butyldec | 38 |
|     |        |      |          |        | Imidazo[1,2-a]pyridin-8-         | 27 |
|     |        |      |          |        | 2-Methoxy-4-methyl-10I           | 27 |
| 160 | 31.558 | 8052 | 2077261  | 36469  | 78025 Tetradecanamide            | 70 |
|     |        |      |          |        | Tetradecanamide                  | 62 |
|     |        |      |          |        | Benzeneethanamine, 2-f           | 60 |
| 161 | 31.671 | 8081 | 3007104  | 37854  | 79687 N,N-Dimethyldecanamid      | 45 |
|     |        |      |          |        | N,N-Dimethyldodecanan            | 45 |
|     |        |      |          |        | Octanamide, N,N-dimetl           | 43 |
| 162 | 31.898 | 8139 | 2134917  | 26921  | 69320 Cyclotetradecane           | 98 |
|     |        |      |          |        | Cetene                           | 96 |
|     |        |      |          |        | 1-Heptadecene                    | 96 |

|     |        |      |          |        |        |                            |    |
|-----|--------|------|----------|--------|--------|----------------------------|----|
| 163 | 32.003 | 8166 | 1227617  | 24283  | 66938  | Cyclododecanecarboxyli     | 59 |
|     |        |      |          |        |        | Cyclododecanone, oxime     | 44 |
|     |        |      |          |        |        | 7-Tridecanone, oxime       | 38 |
| 164 | 32.14  | 8201 | 836591   | 18430  | 61422  | Cyclododecanecarboxyli     | 25 |
|     |        |      |          |        |        | D-Mannoheptadecane-1       | 22 |
|     |        |      |          |        |        | 13-Oxabicyclo[9.3.1]pen    | 18 |
| 165 | 32.226 | 8223 | 1702544  | 24873  | 68075  | 2-Methyl-5-(2,6,6-trimet   | 48 |
|     |        |      |          |        |        | 3-Hexadecanol              | 47 |
|     |        |      |          |        |        | 3-Tetradecanol             | 46 |
| 166 | 32.414 | 8271 | 806549   | 15500  | 59163  | Hexanoic acid, 4,4-dimet   | 30 |
|     |        |      |          |        |        | 1-Hydroxymethyl-7,7-dir    | 30 |
|     |        |      |          |        |        | Bicyclo[2.2.1]heptan-2-c   | 25 |
| 167 | 32.531 | 8301 | 471951   | 14419  | 58375  | 2-Pentene, 2-ethyl-dimet   | 46 |
|     |        |      |          |        |        | N,N-Dimethyldodecanar      | 45 |
|     |        |      |          |        |        | 2-Octanone, O-methylo>     | 43 |
| 168 | 32.738 | 8354 | 3586524  | 83218  | 127682 | Oleic Acid                 | 99 |
|     |        |      |          |        |        | 9-Octadecenoic acid, (E)   | 99 |
|     |        |      |          |        |        | Oleic Acid                 | 99 |
| 169 | 32.836 | 8379 | 14338546 | 128632 | 173329 | Oleic Acid                 | 99 |
|     |        |      |          |        |        | 9-Octadecenoic acid, (E)   | 99 |
|     |        |      |          |        |        | 6-Octadecenoic acid        | 99 |
| 170 | 33.09  | 8444 | 13299680 | 119467 | 164795 | 9-Octadecenoic acid, (E)   | 97 |
|     |        |      |          |        |        | Octadec-9-enoic acid       | 97 |
|     |        |      |          |        |        | Octadecanoic acid          | 96 |
| 171 | 33.332 | 8506 | 8068010  | 79996  | 125922 | Palmitoleic acid           | 93 |
|     |        |      |          |        |        | 9-Octadecenamide, (Z)-     | 91 |
|     |        |      |          |        |        | 9-Octadecenamide, (Z)-     | 91 |
| 172 | 33.563 | 8565 | 23277371 | 186543 | 233034 | Hexadecanamide             | 94 |
|     |        |      |          |        |        | Dodecanamide               | 93 |
|     |        |      |          |        |        | Hexadecanamide             | 91 |
| 173 | 33.958 | 8666 | 9598579  | 145937 | 193395 | N-Methyldodecanamide       | 81 |
|     |        |      |          |        |        | Hexanal, O-methyloxime     | 47 |
|     |        |      |          |        |        | 2-Hexanone oxime           | 38 |
| 174 | 34.219 | 8733 | 1348498  | 28657  | 76764  | Propionic acid, 3-(allylth | 38 |
|     |        |      |          |        |        | Cyclohexanecarboxamid      | 38 |
|     |        |      |          |        |        | Cycloundecanecarboxyli     | 30 |
| 175 | 34.317 | 8758 | 1443700  | 22855  | 71205  | 4-n-Hexylthiane, S,S-dio>  | 74 |
|     |        |      |          |        |        | 2-Methyl-Z-4-tetradecer    | 74 |
|     |        |      |          |        |        | 3-Heptadecene, (Z)-        | 47 |
| 176 | 34.43  | 8787 | 1125844  | 31238  | 79862  | Octanamide, N,N-dimetf     | 76 |
|     |        |      |          |        |        | N,N-Dimethyldecanamid      | 68 |
|     |        |      |          |        |        | 3-Cyclopentylpropionarr    | 64 |
| 177 | 34.528 | 8812 | 6312600  | 74364  | 123228 | N,N-Dimethyldecanamid      | 72 |
|     |        |      |          |        |        | 3-Cyclopentylpropionarr    | 72 |
|     |        |      |          |        |        | Octanamide, N,N-dimetf     | 72 |
| 178 | 34.739 | 8866 | 736213   | 19770  | 69150  | Cyclotridecane             | 86 |
|     |        |      |          |        |        | Cyclopentadecane           | 86 |

|     |        |      |          |        |                                  |    |
|-----|--------|------|----------|--------|----------------------------------|----|
|     |        |      |          |        | 2- Chloropropionic acid,         | 84 |
| 179 | 34.802 | 8882 | 1513345  | 18300  | 67835 Hexadecane, 1,1'-oxybis    | 35 |
|     |        |      |          |        | Acetic acid, bromo-, met         | 35 |
|     |        |      |          |        | 4-Fluoro-1-methyl-5-carl         | 35 |
| 180 | 35.013 | 8936 | 623188   | 13951  | 64005 Z-7-Pentadecenol           | 56 |
|     |        |      |          |        | 4-[N-Methylpiperazino]-          | 44 |
|     |        |      |          |        | 1-Bromo-11-iodoundeca            | 35 |
| 181 | 35.169 | 8976 | 2957591  | 27625  | 78064 Guanidine, N-[3-[(2-bror   | 91 |
|     |        |      |          |        | 1-(2-Methyl-allyl)-1,2,3,4       | 41 |
|     |        |      |          |        | Ethanediamide, N,N'-dib          | 30 |
| 182 | 35.407 | 9037 | 631202   | 13197  | 64223 Phosphetane, 1-bromo-      | 93 |
|     |        |      |          |        | 1-Octadecene                     | 48 |
|     |        |      |          |        | 1-Pentadecene                    | 48 |
| 183 | 35.517 | 9065 | 717813   | 13452  | 64753 Cetene                     | 45 |
|     |        |      |          |        | Methyl Z-11-tetradecenc          | 30 |
|     |        |      |          |        | 2,6-Decadien-1-ol, 7-me          | 20 |
| 184 | 35.658 | 9101 | 932377   | 11340  | 62984 Oxacycloheptadecan-2-c     | 56 |
|     |        |      |          |        | Ethyl 9-tetradecenoate           | 44 |
|     |        |      |          |        | Ethyl 3,4-dihydro-2-(1-h)        | 41 |
| 185 | 35.834 | 9146 | 1040237  | 25132  | 77203 Succinic acid, butyl tetra | 46 |
|     |        |      |          |        | Succinic acid, octadecyl :       | 46 |
|     |        |      |          |        | Succinic acid, pentyl tetr       | 46 |
| 186 | 35.974 | 9182 | 924587   | 15175  | 67595 Octanal, 2-(phenylmethy    | 43 |
|     |        |      |          |        | 2-[1-(4-Cyano-1,2,3,4-te         | 38 |
|     |        |      |          |        | 3-[1-(4-Cyano-1,2,3,4-te         | 30 |
| 187 | 36.08  | 9209 | 3665879  | 98700  | 151385 9-Octadecenamide, (Z)-    | 99 |
|     |        |      |          |        | 9-Octadecenamide, (Z)-           | 99 |
|     |        |      |          |        | 9-Octadecenamide, (Z)-           | 99 |
| 188 | 36.174 | 9233 | 8905747  | 105781 | 158692 9-Octadecenamide, (Z)-    | 99 |
|     |        |      |          |        | 9-Octadecenamide, (Z)-           | 99 |
|     |        |      |          |        | 9-Octadecenamide, (Z)-           | 98 |
| 189 | 36.408 | 9293 | 11615046 | 204382 | 257870 9-Octadecenamide, (Z)-    | 70 |
|     |        |      |          |        | 9-Octadecenamide, (Z)-           | 49 |
|     |        |      |          |        | Benzeneethanamine, 2-f           | 43 |
| 190 | 36.514 | 9320 | 7878007  | 122329 | 176080 Octadecanamide            | 64 |
|     |        |      |          |        | 9-Octadecenamide, (Z)-           | 50 |
|     |        |      |          |        | 9-Octadecenamide, (Z)-           | 50 |
| 191 | 36.76  | 9383 | 4001485  | 77597  | 131952 N-Methyldodecanamide      | 64 |
|     |        |      |          |        | 1,3-Dioxolane, 2-(5-chlor        | 40 |
|     |        |      |          |        | Cyclopentylcarboxylic ac         | 40 |
| 192 | 36.897 | 9418 | 1990230  | 46252  | 100945 9-Octadecenamide, N,N-    | 89 |
|     |        |      |          |        | 2,3-Dimethylperhydro-1,          | 42 |
|     |        |      |          |        | 1,3-Dioxalane, 2-methyl-         | 38 |
| 193 | 37.006 | 9446 | 3664710  | 47802  | 102763 9-Octadecenamide, N,N-    | 91 |
|     |        |      |          |        | Non-7-enoic acid, dimetl         | 49 |
|     |        |      |          |        | N,N-Dimethylhexanamid            | 43 |
| 194 | 37.264 | 9512 | 3845664  | 51072  | 106665 Octanamide, N,N-dimetl    | 72 |

|     |        |       |         |       |                                                 |    |
|-----|--------|-------|---------|-------|-------------------------------------------------|----|
|     |        |       |         |       | 2-Tridecanone, O-methyl                         | 64 |
|     |        |       |         |       | Undecanone, 2-methyl                            | 64 |
| 195 | 37.549 | 9585  | 1852974 | 17116 | 73407 3-Hydroxy-2,5,5,8a-tetra-                 | 58 |
|     |        |       |         |       | Cyclohexanecarboxylic acid                      | 44 |
|     |        |       |         |       | 3,5-Dimethylbenzaldehyde                        | 25 |
| 196 | 37.753 | 9637  | 5095576 | 60551 | 117345 3-(3,4-Dimethyl-6-Phenyl-                | 38 |
|     |        |       |         |       | Goitrin                                         | 38 |
|     |        |       |         |       | N-Decanoylmorpholine                            | 38 |
| 197 | 38.073 | 9719  | 290844  | 6189  | 63772 1,2,3,4-Tetrahydro-9-methyl-              | 56 |
|     |        |       |         |       | Dodecahydropyrido[1,2- <i>b</i> ]-              | 46 |
|     |        |       |         |       | <i>i</i> -Propyl 9-tetradecenoate               | 45 |
| 198 | 38.175 | 9745  | 230174  | 6277  | 64111 E-8-Methyl-9-tetradecenoic acid           | 43 |
|     |        |       |         |       | Cyclopropanoic acid, 2-                         | 42 |
|     |        |       |         |       | Dodecahydropyrido[1,2- <i>b</i> ]-              | 41 |
| 199 | 38.276 | 9771  | 902025  | 9005  | 67087 Benzo[ <i>h</i> ]quinoline, 2,4-dimethyl- | 40 |
|     |        |       |         |       | Hexahydropyridine, 1-methyl-                    | 38 |
|     |        |       |         |       | 1 <i>H</i> -Indole, 1-methyl-2-pyridyl-         | 35 |
| 200 | 38.487 | 9825  | 500214  | 11737 | 70334 3,4-Di-O-acetyl-1:6-anhydride             | 35 |
|     |        |       |         |       | 2-Cyclohexylthiacyclohexane-                    | 30 |
|     |        |       |         |       | 2,4-Imidazolidinedione, 1,3-dimethyl-           | 27 |
| 201 | 38.698 | 9879  | 964926  | 21346 | 80517 9-Octadecenamide, N,N-dimethyl-           | 43 |
|     |        |       |         |       | 5-[ <i>p</i> -Chlorocinnamyl]idene-             | 41 |
|     |        |       |         |       | 9-Octadecenamide, <i>n</i> -butyl-              | 38 |
| 202 | 38.862 | 9921  | 2953358 | 49874 | 109525 Tetradecanoic acid, pyridyl-             | 97 |
|     |        |       |         |       | 10-Methyl-undecanoic acid                       | 96 |
|     |        |       |         |       | Pyrrolidine, 1-(13-methyl-)                     | 95 |
| 203 | 39.023 | 9962  | 1592563 | 38850 | 98967 Octadecanamide, N-butyl-                  | 64 |
|     |        |       |         |       | [1,3,4]Thiadiazol-2-ylmethyl-                   | 49 |
|     |        |       |         |       | Glutaric acid, hexadecyl-                       | 47 |
| 204 | 39.206 | 10009 | 488439  | 8077  | 68744 Dodecahydropyrido[1,2- <i>b</i> ]-        | 50 |
|     |        |       |         |       | tert-Butyl(5-isopropyl-2-oxo-                   | 42 |
|     |        |       |         |       | 3-Quinolinecarboxylic acid                      | 30 |
| 205 | 39.312 | 10036 | 866060  | 22239 | 83209 Benzenamine, 3,4-dimethyl-                | 48 |
|     |        |       |         |       | Morphinan-4-ol-6-one                            | 47 |
|     |        |       |         |       | Benz[ <i>c</i> ]acridine, 5,10-dimethyl-        | 47 |
| 206 | 39.414 | 10062 | 223202  | 6675  | 67953 2-Methyl-7-phenylindole                   | 46 |
|     |        |       |         |       | Benzo[ <i>h</i> ]quinoline, 2,4-dimethyl-       | 46 |
|     |        |       |         |       | Dodecahydropyrido[1,2- <i>b</i> ]-              | 46 |
| 207 | 39.484 | 10080 | 307728  | 6224  | 67703 1-Benzazirone-1-carboxylic acid           | 42 |
|     |        |       |         |       | 2-Pyridinamine, N-(4,5-dimethyl-)               | 38 |
|     |        |       |         |       | Acetic acid, [4-(1,1-dimethyl-)                 | 38 |
| 208 | 39.586 | 10106 | 226360  | 7544  | 69316 2-(Acetoxymethyl)-3-methyl-4-             | 45 |
|     |        |       |         |       | 5-Acetamido-4,7-dioxo-1,2,3,4-                  | 42 |
|     |        |       |         |       | 1 <i>H</i> -Indole, 5-methyl-2-pyridyl-         | 41 |
| 209 | 39.66  | 10125 | 397736  | 6312  | 68310 Trimethylsilyl 3-methyl-4-                | 49 |
|     |        |       |         |       | 2-(5-Adamantan-1-yl)-[1,3-                      | 43 |
|     |        |       |         |       | 3-Quinolinecarboxylic acid                      | 43 |

|     |        |       |         |       |        |                            |    |
|-----|--------|-------|---------|-------|--------|----------------------------|----|
| 210 | 39.98  | 10207 | 1485919 | 24726 | 87669  | 3-[N'-(3H-Indol-3-ylmetf   | 44 |
|     |        |       |         |       |        | Benzo[h]quinoline, 2,4-d   | 35 |
|     |        |       |         |       |        | 1H-Indole, 5-methyl-2-pl   | 35 |
| 211 | 40.086 | 10234 | 2061160 | 28198 | 91451  | 7a,9c-(Iminoethano)phe     | 44 |
|     |        |       |         |       |        | N-Methyl-1-adamantane      | 25 |
|     |        |       |         |       |        | Cyclohexanecarboxylic a    | 25 |
| 212 | 40.305 | 10290 | 2305315 | 35557 | 99449  | Succinic acid, docosyl etl | 22 |
|     |        |       |         |       |        | 2,2'-Oxybis(ethane-2,1-c   | 22 |
|     |        |       |         |       |        | 2,2'-Oxybis(ethane-2,1-c   | 22 |
| 213 | 40.641 | 10376 | 430072  | 5804  | 70732  | 2,3,5,6-Tetrafluorophen'   | 35 |
|     |        |       |         |       |        | 5-Acetamido-4,7-dioxo-4    | 35 |
|     |        |       |         |       |        | 4-(1,1-Dimethylpropyl)p    | 35 |
| 214 | 40.84  | 10427 | 293645  | 5562  | 71166  | 1,2-Benzisothiazol-3-am    | 55 |
|     |        |       |         |       |        | Propiophenone, 2'-(trim    | 50 |
|     |        |       |         |       |        | Silane, trimethyl[5-meth   | 45 |
| 215 | 41.063 | 10484 | 501751  | 11624 | 77999  | Pyrrolidine, 1-(1-oxo-10-  | 62 |
|     |        |       |         |       |        | Pyrrolidine, 1-(1-oxo-10-  | 60 |
|     |        |       |         |       |        | Pyrrolidine, 1-(1-oxo-7-c  | 60 |
| 216 | 41.161 | 10509 | 930883  | 14144 | 80841  | Pyrrolidine, 1-(1-oxo-7-c  | 56 |
|     |        |       |         |       |        | 16-Octadecenoic acid, D    | 53 |
|     |        |       |         |       |        | Pyrrolidine, 1-(1-oxo-9-c  | 53 |
| 217 | 41.286 | 10541 | 3618119 | 91054 | 158182 | Benzenecarbothioamide      | 44 |
|     |        |       |         |       |        | Anthracene, 9-ethyl-9,10   | 15 |
|     |        |       |         |       |        | Hexanoic acid, 2,7-dimet   | 15 |
| 218 | 41.524 | 10602 | 564684  | 19090 | 87036  | 1,2-Bis(trimethylsilyl)ber | 49 |
|     |        |       |         |       |        | 1,4-Bis(trimethylsilyl)ber | 46 |
|     |        |       |         |       |        | Propiophenone, 2'-(trim    | 41 |
| 219 | 41.614 | 10625 | 2710811 | 62173 | 130432 | 16-Pregnenolone            | 46 |
|     |        |       |         |       |        | 2-Ethylacridine            | 25 |
|     |        |       |         |       |        | Benzo[h]quinoline, 2,4-d   | 20 |
| 220 | 41.872 | 10691 | 2586171 | 77939 | 147081 | Anthracene, 9-ethyl-9,10   | 25 |
|     |        |       |         |       |        | 1,3-Diphenyl-1,2-butane    | 25 |
|     |        |       |         |       |        | Glycine, N-[(phenylmeth    | 25 |
| 221 | 42.04  | 10734 | 1930191 | 64245 | 134117 | Anthracene, 9-ethyl-9,10   | 30 |
|     |        |       |         |       |        | 5-Methyl-2-trimethylsily   | 25 |
|     |        |       |         |       |        | Pyridine, 1,2,3,6-tetrahy  | 22 |
| 222 | 42.138 | 10759 | 289826  | 8869  | 79307  | Silane, trimethyl[5-meth   | 49 |
|     |        |       |         |       |        | 2-Ethylacridine            | 46 |
|     |        |       |         |       |        | 5-Methyl-2-trimethylsily   | 46 |
| 223 | 42.255 | 10789 | 299659  | 4928  | 76066  | Trimethyl(4-tert-butylph   | 47 |
|     |        |       |         |       |        | 2-Ethylacridine            | 43 |
|     |        |       |         |       |        | Pyrido[2,3-d]pyrimidine,   | 43 |
| 224 | 42.532 | 10860 | 745108  | 12793 | 85568  | Silane, trimethyl[5-meth   | 49 |
|     |        |       |         |       |        | Trimethyl[4-(1,1,3,3,-tet  | 46 |
|     |        |       |         |       |        | 5-Methyl-2-phenylindoli    | 43 |
| 225 | 42.638 | 10887 | 789686  | 19437 | 92835  | Silane, trimethyl[5-meth   | 53 |
|     |        |       |         |       |        | Tris(tert-butyl)dimethylsi | 47 |

|     |        |       |         |       |                                      |    |
|-----|--------|-------|---------|-------|--------------------------------------|----|
|     |        |       |         |       | 5-Methyl-2-trimethylsilyl            | 47 |
| 226 | 42.904 | 10955 | 459596  | 6093  | 81055 Silicic acid, diethyl bis(tri  | 50 |
|     |        |       |         |       | Propiophenone, 2'-(trim              | 49 |
|     |        |       |         |       | Cyclotrisiloxane, hexame             | 46 |
| 227 | 42.994 | 10978 | 197509  | 6275  | 81762 Propiophenone, 2'-(trim        | 53 |
|     |        |       |         |       | Silicic acid, diethyl bis(tri        | 50 |
|     |        |       |         |       | 1,2-Benzisothiazol-3-am              | 49 |
| 228 | 43.158 | 11020 | 1298949 | 22378 | 98844 2-(Acetoxymethyl)-3-(m         | 45 |
|     |        |       |         |       | 7a,9c-(Iminoethano)phe               | 41 |
|     |        |       |         |       | 2-Methyl-7-phenylindole              | 38 |
| 229 | 43.236 | 11040 | 482306  | 14299 | 91236 Anthracene, 9,10-dihydr        | 46 |
|     |        |       |         |       | Tris(tert-butyltrimethylsi           | 46 |
|     |        |       |         |       | Benzo[h]quinoline, 2,4-d             | 46 |
| 230 | 43.357 | 11071 | 228562  | 5691  | 83333 1,2-Benzisothiazol-3-am        | 50 |
|     |        |       |         |       | Benzo[h]quinoline, 2,4-d             | 45 |
|     |        |       |         |       | Tris(tert-butyltrimethylsi           | 43 |
| 231 | 43.502 | 11108 | 966705  | 27342 | 106148 Benzo[h]quinoline, 2,4-d      | 46 |
|     |        |       |         |       | 5-Methyl-2-trimethylsilyl            | 43 |
|     |        |       |         |       | N,N-Dimethyl-4-nitroso-              | 43 |
| 232 | 43.725 | 11165 | 505724  | 10129 | 91100 Tris(tert-butyltrimethylsi     | 46 |
|     |        |       |         |       | 5-Methyl-2-phenylindoli              | 46 |
|     |        |       |         |       | Cyclotrisiloxane, hexame             | 46 |
| 233 | 43.818 | 11189 | 902923  | 17943 | 99812 Trimethyl[4-(1,1,3,3,-tet      | 46 |
|     |        |       |         |       | 5-Methyl-2-phenylindoli              | 46 |
|     |        |       |         |       | 1,2-Bis(trimethylsilyl)ber           | 43 |
| 234 | 44.068 | 11253 | 1127789 | 29106 | 113645 Benzo[h]quinoline, 2,4-d      | 38 |
|     |        |       |         |       | Cyclotrisiloxane, hexame             | 38 |
|     |        |       |         |       | 5-Methyl-2-phenylindoli              | 38 |
| 235 | 44.233 | 11295 | 850873  | 25540 | 112095 Silicic acid, diethyl bis(tri | 53 |
|     |        |       |         |       | Benzo[h]quinoline, 2,4-d             | 46 |
|     |        |       |         |       | 5-Methyl-2-phenylindoli              | 46 |
| 236 | 44.334 | 11321 | 192336  | 7145  | 94975 Cyclotrisiloxane, hexame       | 46 |
|     |        |       |         |       | Tris(tert-butyltrimethylsi           | 46 |
|     |        |       |         |       | 1,4-Bis(trimethylsilyl)ber           | 43 |
| 237 | 44.42  | 11343 | 89908   | 3301  | 92203 2-(Acetoxymethyl)-3-(m         | 47 |
|     |        |       |         |       | 1,2-Benzisothiazol-3-am              | 46 |
|     |        |       |         |       | Tris(tert-butyltrimethylsi           | 46 |
| 238 | 44.631 | 11397 | 304833  | 4831  | 97407 Cyclotrisiloxane, hexame       | 46 |
|     |        |       |         |       | 5-Methyl-2-phenylindoli              | 46 |
|     |        |       |         |       | Anthracene, 9,10-diethy              | 46 |
| 239 | 44.713 | 11418 | 158379  | 4639  | 98793 Benzo[h]quinoline, 2,4-d       | 49 |
|     |        |       |         |       | 5-Methyl-2-phenylindoli              | 46 |
|     |        |       |         |       | 4-Methyl-2-trimethylsilyl            | 46 |
| 240 | 45.151 | 11530 | 1907779 | 28050 | 130145 Tris(tert-butyltrimethylsi    | 49 |
|     |        |       |         |       | 5-Methyl-2-phenylindoli              | 46 |
|     |        |       |         |       | Cyclotrisiloxane, hexame             | 43 |
| 241 | 45.366 | 11585 | 742438  | 12183 | 115913 Tris(tert-butyltrimethylsi    | 49 |



|     |        |       |          |       |        |                           |    |
|-----|--------|-------|----------|-------|--------|---------------------------|----|
|     |        |       |          |       |        | Cyclotrisiloxane, hexame  | 46 |
|     |        |       |          |       |        | 1,2-Benzisothiazol-3-am   | 46 |
| 242 | 45.804 | 11697 | 711151   | 6966  | 114701 | Tris(tert-butyldimethylsi | 49 |
|     |        |       |          |       |        | Cyclotrisiloxane, hexame  | 46 |
|     |        |       |          |       |        | Arsenous acid, tris(trime | 43 |
| 243 | 46.163 | 11789 | 977611   | 8988  | 120377 | Tris(tert-butyldimethylsi | 49 |
|     |        |       |          |       |        | Cyclotrisiloxane, hexame  | 46 |
|     |        |       |          |       |        | 2,4,6-Cycloheptatrien-1-  | 43 |
| 244 | 46.288 | 11821 | 909342   | 11780 | 124471 | Tris(tert-butyldimethylsi | 53 |
|     |        |       |          |       |        | Tetrasiloxane, decameth   | 47 |
|     |        |       |          |       |        | Cyclotrisiloxane, hexame  | 46 |
| 245 | 46.445 | 11861 | 1078777  | 11739 | 126024 | Cyclotrisiloxane, hexame  | 46 |
|     |        |       |          |       |        | Tris(tert-butyldimethylsi | 46 |
|     |        |       |          |       |        | Cyclotrisiloxane, hexame  | 43 |
| 246 | 46.644 | 11912 | 2635071  | 23484 | 139797 | Tris(tert-butyldimethylsi | 49 |
|     |        |       |          |       |        | Cyclotrisiloxane, hexame  | 46 |
|     |        |       |          |       |        | Cyclotrisiloxane, hexame  | 43 |
| 247 | 47.156 | 12043 | 4956424  | 29525 | 151040 | Tris(tert-butyldimethylsi | 49 |
|     |        |       |          |       |        | Trimethyl[4-(2-methyl-4-  | 47 |
|     |        |       |          |       |        | Cyclotrisiloxane, hexame  | 46 |
| 248 | 47.281 | 12075 | 1641704  | 26156 | 148954 | Arsenous acid, tris(trime | 46 |
|     |        |       |          |       |        | Cyclotrisiloxane, hexame  | 46 |
|     |        |       |          |       |        | Tris(tert-butyldimethylsi | 46 |
| 249 | 48.086 | 12281 | 15359817 | 42367 | 173319 | Tris(tert-butyldimethylsi | 49 |
|     |        |       |          |       |        | Cyclotrisiloxane, hexame  | 46 |
|     |        |       |          |       |        | Tetrasiloxane, decameth   | 43 |
| 250 | 48.919 | 12494 | 25559202 | 64212 | 203630 | Cyclotrisiloxane, hexame  | 49 |
|     |        |       |          |       |        | Arsenous acid, tris(trime | 47 |
|     |        |       |          |       |        | Tetrasiloxane, decameth   | 47 |
| 251 | 49.028 | 12522 | 4956042  | 67206 | 207755 | Tris(tert-butyldimethylsi | 49 |
|     |        |       |          |       |        | Tetrasiloxane, decameth   | 47 |
|     |        |       |          |       |        | Cyclotrisiloxane, hexame  | 46 |
| 252 | 49.47  | 12635 | 16392416 | 69565 | 214595 | Arsenous acid, tris(trime | 52 |
|     |        |       |          |       |        | Cyclotrisiloxane, hexame  | 52 |
|     |        |       |          |       |        | Cyclotrisiloxane, hexame  | 50 |
| 253 | 49.782 | 12715 | 16080488 | 69124 | 217337 | Cyclotrisiloxane, hexame  | 49 |
|     |        |       |          |       |        | Tris(tert-butyldimethylsi | 49 |
|     |        |       |          |       |        | Arsenous acid, tris(trime | 49 |
| 254 | 49.923 | 12751 | 5789615  | 67113 | 216750 | Cyclotrisiloxane, hexame  | 49 |
|     |        |       |          |       |        | Arsenous acid, tris(trime | 49 |
|     |        |       |          |       |        | Tris(tert-butyldimethylsi | 49 |
| 255 | 50.072 | 12789 | 3393804  | 66762 | 217934 | Tris(tert-butyldimethylsi | 49 |
|     |        |       |          |       |        | Cyclotrisiloxane, hexame  | 49 |
|     |        |       |          |       |        | Cyclotrisiloxane, hexame  | 49 |
| 256 | 50.209 | 12824 | 11035049 | 63710 | 216259 | Tris(tert-butyldimethylsi | 49 |
|     |        |       |          |       |        | Cyclotrisiloxane, hexame  | 46 |
|     |        |       |          |       |        | Cyclotrisiloxane, hexame  | 43 |

|     |        |       |         |       |        |                           |    |
|-----|--------|-------|---------|-------|--------|---------------------------|----|
| 257 | 50.463 | 12889 | 3329250 | 59062 | 214196 | Cyclotrisiloxane, hexame  | 49 |
|     |        |       |         |       |        | Tris(tert-butyldimethylsi | 47 |
|     |        |       |         |       |        | 1,1,1,3,5,5,5-Heptameth   | 47 |
| 258 | 50.56  | 12914 | 2198049 | 57656 | 213804 | Cyclotrisiloxane, hexame  | 49 |
|     |        |       |         |       |        | Arsenous acid, tris(trime | 47 |
|     |        |       |         |       |        | Tetrasiloxane, decameth   | 47 |
| 259 | 50.631 | 12932 | 1948985 | 57348 | 214193 | Cyclotrisiloxane, hexame  | 49 |
|     |        |       |         |       |        | Tris(tert-butyldimethylsi | 47 |
|     |        |       |         |       |        | Methyltris(trimethylsilo> | 47 |
| 260 | 50.721 | 12955 | 7951726 | 55612 | 213371 | Cyclotrisiloxane, hexame  | 53 |
|     |        |       |         |       |        | Cyclotrisiloxane, hexame  | 49 |
|     |        |       |         |       |        | Tetrasiloxane, decameth   | 47 |
| 261 | 50.963 | 13017 | 7194726 | 53284 | 213500 | Tris(tert-butyldimethylsi | 49 |
|     |        |       |         |       |        | Tetrasiloxane, decameth   | 47 |
|     |        |       |         |       |        | Arsenous acid, tris(trime | 46 |
| 262 | 51.182 | 13073 | 6501596 | 49708 | 212146 | Tris(tert-butyldimethylsi | 53 |
|     |        |       |         |       |        | 2,4,6-Cycloheptatrien-1-  | 47 |
|     |        |       |         |       |        | Cyclotrisiloxane, hexame  | 47 |
| 263 | 51.518 | 13159 | 6555435 | 46287 | 212143 | Cyclotrisiloxane, hexame  | 49 |
|     |        |       |         |       |        | Cyclotrisiloxane, hexame  | 49 |
|     |        |       |         |       |        | Tetrasiloxane, decameth   | 47 |
| 264 | 51.666 | 13197 | 5234333 | 43956 | 211348 | 1,1,1,3,5,5,5-Heptameth   | 47 |
|     |        |       |         |       |        | Cyclotrisiloxane, hexame  | 47 |
|     |        |       |         |       |        | Arsenous acid, tris(trime | 47 |
| 265 | 51.858 | 13246 | 2819613 | 41052 | 210391 | Tetrasiloxane, decameth   | 47 |
|     |        |       |         |       |        | Arsenous acid, tris(trime | 46 |
|     |        |       |         |       |        | Cyclotrisiloxane, hexame  | 43 |
| 266 | 52.03  | 13290 | 4628095 | 39364 | 210459 | Cyclotrisiloxane, hexame  | 49 |
|     |        |       |         |       |        | Cyclotrisiloxane, hexame  | 49 |
|     |        |       |         |       |        | Tris(tert-butyldimethylsi | 49 |
| 267 | 52.182 | 13329 | 5264782 | 37510 | 210144 | Cyclotrisiloxane, hexame  | 58 |
|     |        |       |         |       |        | Cyclotrisiloxane, hexame  | 52 |
|     |        |       |         |       |        | Arsenous acid, tris(trime | 47 |
| 268 | 52.616 | 13440 | 5409979 | 32490 | 209525 | Cyclotrisiloxane, hexame  | 49 |
|     |        |       |         |       |        | Cyclotrisiloxane, hexame  | 49 |
|     |        |       |         |       |        | 2-(Acetoxymethyl)-3-(m    | 47 |
| 269 | 52.776 | 13481 | 2057031 | 31211 | 209868 | Cyclotrisiloxane, hexame  | 49 |
|     |        |       |         |       |        | Tetrasiloxane, decameth   | 47 |
|     |        |       |         |       |        | Arsenous acid, tris(trime | 47 |
| 270 | 52.843 | 13498 | 1748286 | 28529 | 207868 | Cyclotrisiloxane, hexame  | 58 |
|     |        |       |         |       |        | Tris(tert-butyldimethylsi | 52 |
|     |        |       |         |       |        | Arsenous acid, tris(trime | 50 |
| 271 | 52.968 | 13530 | 2847678 | 25035 | 205664 | Tris(tert-butyldimethylsi | 52 |
|     |        |       |         |       |        | Cyclotrisiloxane, hexame  | 49 |
|     |        |       |         |       |        | Methyltris(trimethylsilo> | 47 |
| 272 | 53.159 | 13579 | 918958  | 23957 | 206518 | Cyclotrisiloxane, hexame  | 52 |
|     |        |       |         |       |        | Tris(tert-butyldimethylsi | 49 |

|     |        |       |         |       |                                  |    |
|-----|--------|-------|---------|-------|----------------------------------|----|
|     |        |       |         |       | Arsenous acid, tris(trime        | 49 |
| 273 | 53.245 | 13601 | 1979272 | 23751 | 207192 Cyclotrisiloxane, hexame  | 49 |
|     |        |       |         |       | Cyclotrisiloxane, hexame         | 49 |
|     |        |       |         |       | Arsenous acid, tris(trime        | 49 |
| 274 | 53.433 | 13649 | 1671939 | 21383 | 206747 Cyclotrisiloxane, hexame  | 58 |
|     |        |       |         |       | Cyclotrisiloxane, hexame         | 52 |
|     |        |       |         |       | Arsenous acid, tris(trime        | 49 |
| 275 | 53.519 | 13671 | 1071992 | 18909 | 205122 Arsenous acid, tris(trime | 52 |
|     |        |       |         |       | Cyclotrisiloxane, hexame         | 52 |
|     |        |       |         |       | Tris(tert-butyldimethylsi        | 52 |
| 276 | 53.675 | 13711 | 1364240 | 18972 | 206781 Tris(tert-butyldimethylsi | 52 |
|     |        |       |         |       | Arsenous acid, tris(trime        | 52 |
|     |        |       |         |       | Cyclotrisiloxane, hexame         | 50 |
| 277 | 53.757 | 13732 | 1042648 | 18059 | 206717 Cyclotrisiloxane, hexame  | 58 |
|     |        |       |         |       | Cyclotrisiloxane, hexame         | 50 |
|     |        |       |         |       | Tetrasiloxane, decameth          | 50 |
| 278 | 53.847 | 13755 | 997462  | 16469 | 206041 Cyclotrisiloxane, hexame  | 58 |
|     |        |       |         |       | Tris(tert-butyldimethylsi        | 52 |
|     |        |       |         |       | Arsenous acid, tris(trime        | 52 |
| 279 | 53.957 | 13783 | 2438694 | 15947 | 206631 Cyclotrisiloxane, hexame  | 50 |
|     |        |       |         |       | Arsenous acid, tris(trime        | 47 |
|     |        |       |         |       | 1,1,1,3,5,5-Heptameth            | 47 |
| 280 | 54.344 | 13882 | 1207499 | 11057 | 205670 Arsenous acid, tris(trime | 52 |
|     |        |       |         |       | Cyclotrisiloxane, hexame         | 52 |
|     |        |       |         |       | Tetrasiloxane, decameth          | 47 |
| 281 | 54.508 | 13924 | 1188408 | 7778  | 204059 Cyclotrisiloxane, hexame  | 58 |
|     |        |       |         |       | Arsenous acid, tris(trime        | 52 |
|     |        |       |         |       | Cyclotrisiloxane, hexame         | 49 |
| 282 | 54.926 | 14031 | 384682  | 3001  | 203533 Tris(tert-butyldimethylsi | 52 |
|     |        |       |         |       | Cyclotrisiloxane, hexame         | 49 |
|     |        |       |         |       | Arsenous acid, tris(trime        | 49 |
